# Supplementary material for: The landscape of viral expression and host gene fusion and adaptation in human cancer
Source: Springer Nature journal article supplement (doi:10.1038/ncomms3513), 2013-10-01
Supplement: 41467_2013_BFncomms3513_MOESM349_ESM.pdf [file 41467_2013_BFncomms3513_MOESM349_ESM.pdf]

## Supplementary Information

### Supplementary Figures

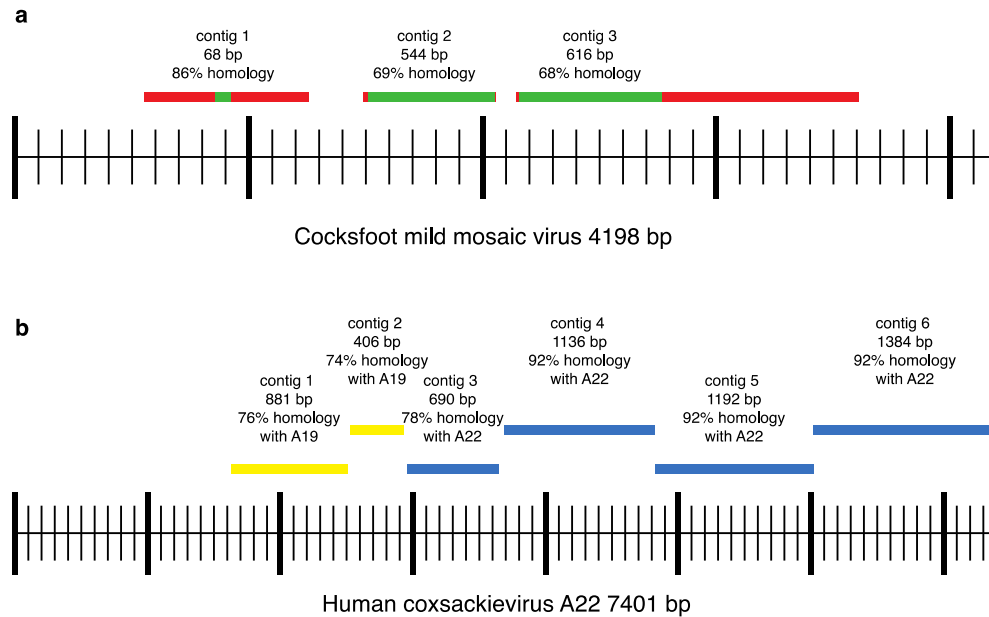

**Supplementary Figure S1. Graphical illustration of contig coverage of novel assembled genomes.** (a) Contig (red and green bars) positions in relation to the Cocksfoot mild mosaic virus genome (Genbank: EU081018) (CMMV). Red bars correspond to sequences that primarily align to CMMV or other mosaic viruses, but with poor sequence identity. Green bars represent strong homology. (b) Contigs (yellow and blue bars) relative to Human coxsackievirus A22 (Genbank: DQ995647). Contigs 1-2 share homology with A19. Contig 3 displays homology to both A19 and A22, most likely reflecting region conserved between the two viral strains. Contigs 4-6 are more similar to A22 than A19.

# The landscape of viral expression and integration in human cancer

**a**

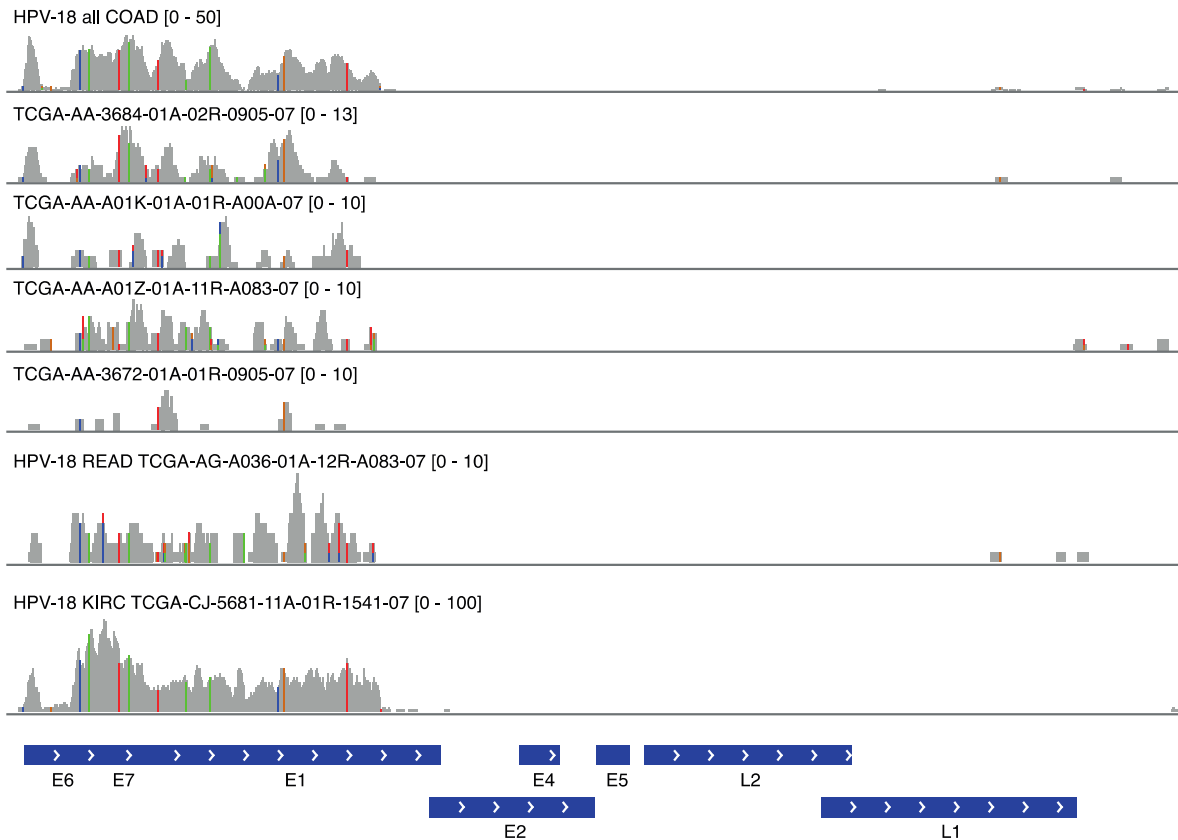

**b**

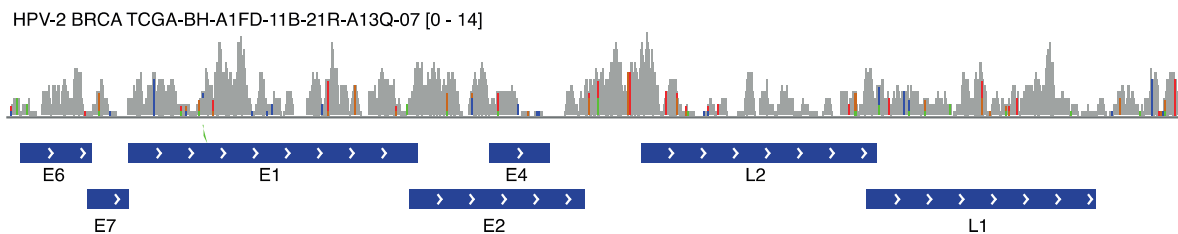

**Supplementary Figure S2. Graphical illustration of viral gene expression patterns in HPV-positive COAD, READ, KIRC and BRCA.** (a) Viral mRNA from all (top row) and individual COAD as well as individual READ and KIRC aligned to HPV18 (Genbank: NC\_001357.1). Low count reads (numbers within brackets) and E1 expression indicate few infected cells and a virus in replicative phase respectively. (b) Viral mRNA from BRCA aligned to HPV2 (Genbank: NC\_001352.1). High expression levels of capsid-proteins L1 and L2 suggest late stage of infection and assembly of progeny virions. Colored rows in mRNA pattern profile represent nucleotide mismatches to reference sequence.

## The landscape of viral expression and integration in human cancer

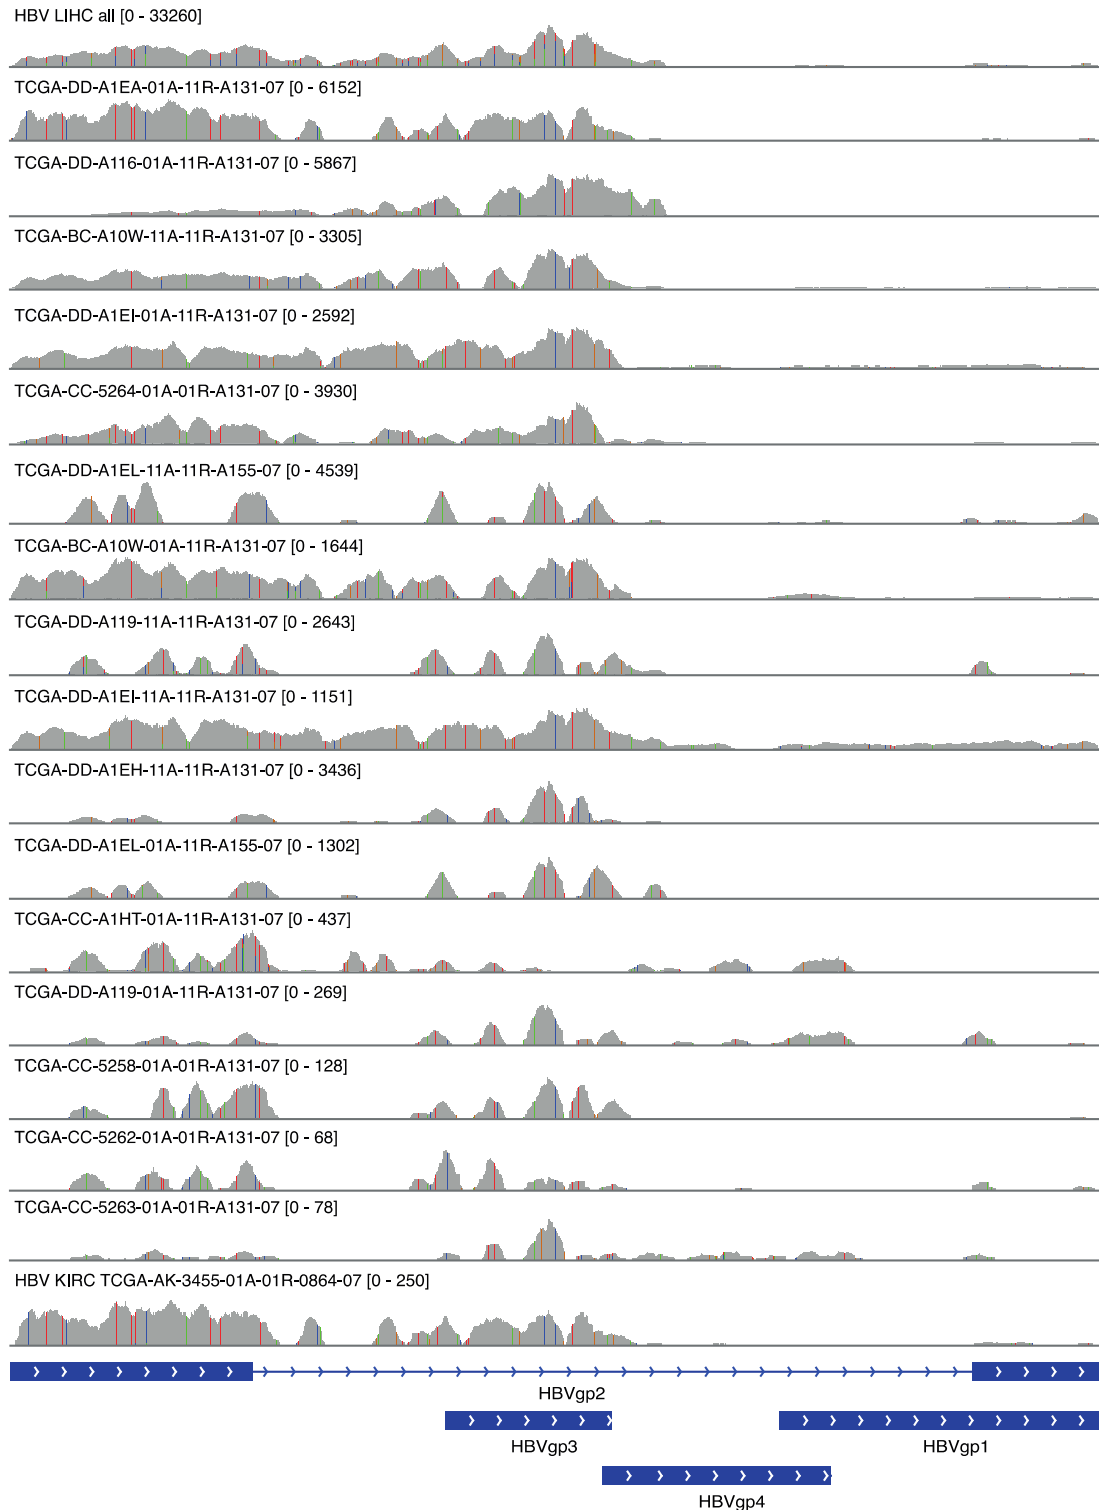

**Supplementary Figure S3. Graphical illustration of viral gene expression patterns in HBV-positive tumors.** Viral mRNA from all (top row) and individual LIHC and KIRC (bottom row) aligned to HBV (Genbank: NC\_003977.1) Majority of reads align to HBVgp2 (S-antigen) and HBVgp3 (X-antigen). Colored rows in mRNA pattern profile represent nucleotide mismatches to reference sequence.

## The landscape of viral expression and integration in human cancer

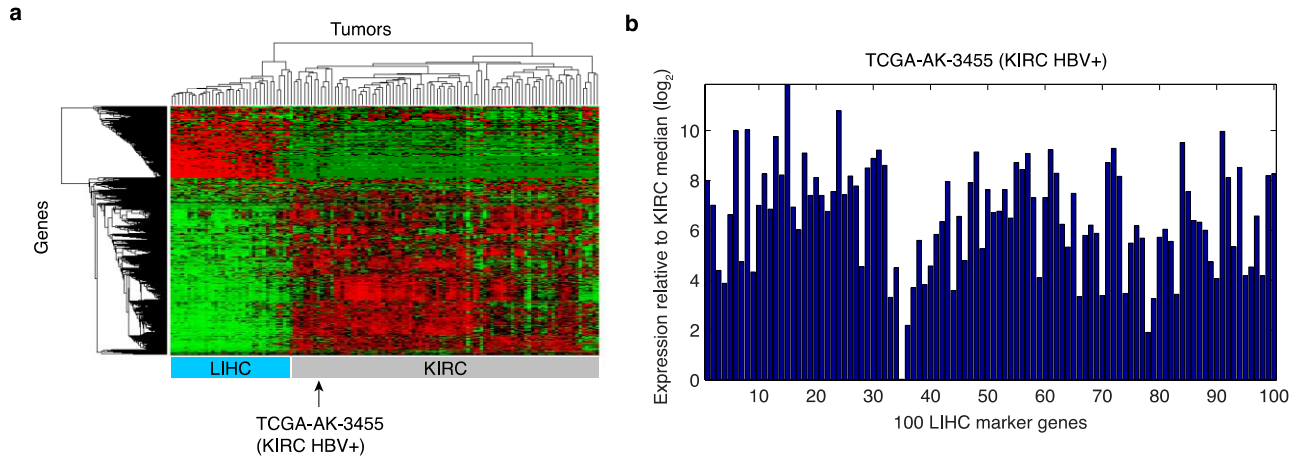

**Supplementary Figure S4. An HBV-positive KIRC tumor shows a typical KIRC mRNA profile, but with consistent weak induction of LIHC markers.** (a) Unsupervised hierarchical clustering of 34 LIHC tumors and 100 KIRC tumors (Pearson's correlation coefficient, and using top 2500 most variable genes based on standard deviation across included samples). The single HBV-positive tumor (TCGA-AK-3455) had a gross expression profile similar to other KIRC tumors. (b) Closer study of TCGA-AK-3455 revealed consistent induction of LIHC marker genes (top 50 genes induced in LIHC relative to KIRC samples). ND, not detected.

# The landscape of viral expression and integration in human cancer

**a**

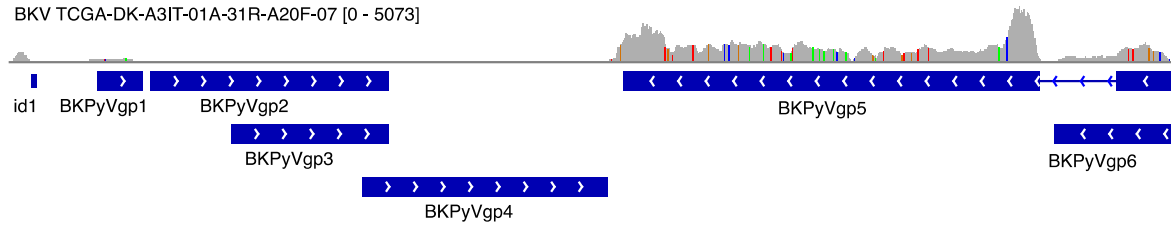

**b**

|                      |                                                                                                                                                                                                                                                                |     |     |     |     |     |     |     |     |     |     |     |     |     |
|----------------------|----------------------------------------------------------------------------------------------------------------------------------------------------------------------------------------------------------------------------------------------------------------|-----|-----|-----|-----|-----|-----|-----|-----|-----|-----|-----|-----|-----|
|                      | 1                                                                                                                                                                                                                                                              | 10  | 20  | 30  | 40  | 50  | 60  | 70  | 80  | 90  | 100 | 110 | 120 | 130 |
| NC_001538.1_BKPyVgp5 | ----- ----- ----- ----- ----- ----- ----- ----- ----- ----- ----- ----- ----- ----- -----                                                                                                                                                                      |     |     |     |     |     |     |     |     |     |     |     |     |     |
| BLCA_DK31T_BKPyVgp5  | ----- ----- ----- ----- ----- ----- ----- ----- ----- ----- ----- ----- ----- ----- -----                                                                                                                                                                      |     |     |     |     |     |     |     |     |     |     |     |     |     |
|                      | HDKYLNRRESNELHOLLGLERAAHGNLPLMRKAYLRKCKEFHPDKGGDEKRRMNTLYKKEQDQVVAHQPDFGTMSSEVPTVGTTEEESMSSSFNEKNDOLFCHEDHFRASDEERATDSQHSPPKK<br>HDKYLNRRESNELHOLLGLERAAHGNLPLMRKAYLRKCKEFHPDKGGDEKRRMNTLYKKEQDQVVAHQPDFGTMSSEVPTVGTTEEESMSSSFNEKNDOLFCHEDHFRASDEERATDSQHSPPKK |     |     |     |     |     |     |     |     |     |     |     |     |     |
|                      | 131                                                                                                                                                                                                                                                            | 140 | 150 | 160 | 170 | 180 | 190 | 200 | 210 | 220 | 230 | 240 | 250 | 260 |
| NC_001538.1_BKPyVgp5 | ----- ----- ----- ----- ----- ----- ----- ----- ----- ----- ----- ----- ----- ----- -----                                                                                                                                                                      |     |     |     |     |     |     |     |     |     |     |     |     |     |
| BLCA_DK31T_BKPyVgp5  | ----- ----- ----- ----- ----- ----- ----- ----- ----- ----- ----- ----- ----- ----- -----                                                                                                                                                                      |     |     |     |     |     |     |     |     |     |     |     |     |     |
|                      | KRKVEDPKDFPSDLHQFVSRVFSNRTLACFAYVTTKEKAQILYKLEKYSVTFISRHCAGHNIFFLTPHRRVSRINNFQKLCCTFSFLICKGVNKEYLLYSALTRDPYHTIEESIQQGLKEHDFS<br>KRKVEDPKDFPSDLHQFVSRVFSNRTLACFAYVTTKEKAQILYKLEKYSVTFISRHCAGHNIFFLTPHRRVSRINNFQKLCCTFSFLICKGVNKEYLLYSALTRDPYHTIEESIQQGLKEHDFS   |     |     |     |     |     |     |     |     |     |     |     |     |     |
|                      | 261                                                                                                                                                                                                                                                            | 270 | 280 | 290 | 300 | 310 | 320 | 330 | 340 | 350 | 360 | 370 | 380 | 390 |
| NC_001538.1_BKPyVgp5 | ----- ----- ----- ----- ----- ----- ----- ----- ----- ----- ----- ----- ----- ----- -----                                                                                                                                                                      |     |     |     |     |     |     |     |     |     |     |     |     |     |
| BLCA_DK31T_BKPyVgp5  | ----- ----- ----- ----- ----- ----- ----- ----- ----- ----- ----- ----- ----- ----- -----                                                                                                                                                                      |     |     |     |     |     |     |     |     |     |     |     |     |     |
|                      | PEEPEETKQVSAKLITEYAVETKCEDVFLLLGAYLEFYQYNVEECKKCKDQPYHFYHEKHFANAIFRESKNQKSIQQAVDTVLAKKRYDTHATRECHLTERFNHLLDKMOLFGAGHARVLEQYM<br>PEEPEETKQVSAKLITEYAVETKCEDVFLLLGAYLEFYQYNVEECKKCKDQPYHFYHEKHFANAIFRESKNQKSIQQAVDTVLAKKRYDTHATRECHLTERFNHLLDKMOLFGAGHARVLEQYM   |     |     |     |     |     |     |     |     |     |     |     |     |     |
|                      | 391                                                                                                                                                                                                                                                            | 400 | 410 | 420 | 430 | 440 | 450 | 460 | 470 | 480 | 490 | 500 | 510 | 520 |
| NC_001538.1_BKPyVgp5 | ----- ----- ----- ----- ----- ----- ----- ----- ----- ----- ----- ----- ----- ----- -----                                                                                                                                                                      |     |     |     |     |     |     |     |     |     |     |     |     |     |
| BLCA_DK31T_BKPyVgp5  | ----- ----- ----- ----- ----- ----- ----- ----- ----- ----- ----- ----- ----- ----- -----                                                                                                                                                                      |     |     |     |     |     |     |     |     |     |     |     |     |     |
|                      | AGVHALHCLLPKNDVIFDFLHCTVFNPKRRYALFKGPIDSGKTTLAGLLDLGGKALWNLPAERLTFELGVADQYHYFEDVKGTAESKDLPSGHGINNLSLKDYLDSGVKMLEKALMKRT<br>AGVHALHCLLPKNDVIFDFLHCTVFNPKRRYALFKGPIDSGKTTLAGLLDLGGKALWNLPAERLTFELGVADQYHYFEDVKGTAESKDLPSGHGINNLSLKDYLDSGVKMLEKALMKRT             |     |     |     |     |     |     |     |     |     |     |     |     |     |
|                      | 521                                                                                                                                                                                                                                                            | 530 | 540 | 550 | 560 | 570 | 580 | 590 | 600 | 610 | 620 | 630 | 640 | 650 |
| NC_001538.1_BKPyVgp5 | ----- ----- ----- ----- ----- ----- ----- ----- ----- ----- ----- ----- ----- ----- -----                                                                                                                                                                      |     |     |     |     |     |     |     |     |     |     |     |     |     |
| BLCA_DK31T_BKPyVgp5  | ----- ----- ----- ----- ----- ----- ----- ----- ----- ----- ----- ----- ----- ----- -----                                                                                                                                                                      |     |     |     |     |     |     |     |     |     |     |     |     |     |
|                      | QIFPPGLVTNNEYVPPKTLGARFVQTDFRPKIYLRKSLQNSEFLLKRLIQSGHTLLLLLWFRPVAFATDIQSRVEMKERLQSEISHYTFSRHKYNTGKCCILDTREEDSETDSGHGSTESEQ<br>QIFPPGLVTNNEYVPPKTLGARFVQTDFRPKIYLRKSLQNSEFLLKRLIQSGHTLLLLLWFRPVAFATDIQSRVEMKERLQSEISHYTFSRHKYNTGKCCILDTREEDSETDSGHGSTESEQ       |     |     |     |     |     |     |     |     |     |     |     |     |     |
|                      | 651                                                                                                                                                                                                                                                            | 660 | 670 | 680 | 690 | 695 |     |     |     |     |     |     |     |     |
| NC_001538.1_BKPyVgp5 | ----- ----- ----- ----- ----- -----                                                                                                                                                                                                                            |     |     |     |     |     |     |     |     |     |     |     |     |     |
| BLCA_DK31T_BKPyVgp5  | ----- ----- ----- ----- ----- -----                                                                                                                                                                                                                            |     |     |     |     |     |     |     |     |     |     |     |     |     |
|                      | SQCSSQVSDTSAPRAEDSQRSDPHSQELHLCGFCQCFKRPKTPPPK<br>SQCSSQVSDTSAPRAEDSQRSDPHSQELHLCGFCQCFKRPKTPPPK                                                                                                                                                               |     |     |     |     |     |     |     |     |     |     |     |     |     |

**Supplementary Figure S5. Graphical illustration of viral gene expression patterns in BKV-positive BLCA and protein sequence of BKPyVgp5.** (a) Viral mRNA from BLCA-tumor aligned to BKV (Genbank: NC\_001538.1). The oncogenic proteins BKPyVgp6 (small T-antigen) and to greater extent BKPyVgp5 (large T-antigen) are mainly expressed in this tumor. Colored rows in mRNA pattern profile represent nucleotide mismatches to reference sequence. (b) Protein sequence of BKPyVgp5 in BLCA compared to reference sequence display five substitutions, but no truncations.

## The landscape of viral expression and integration in human cancer

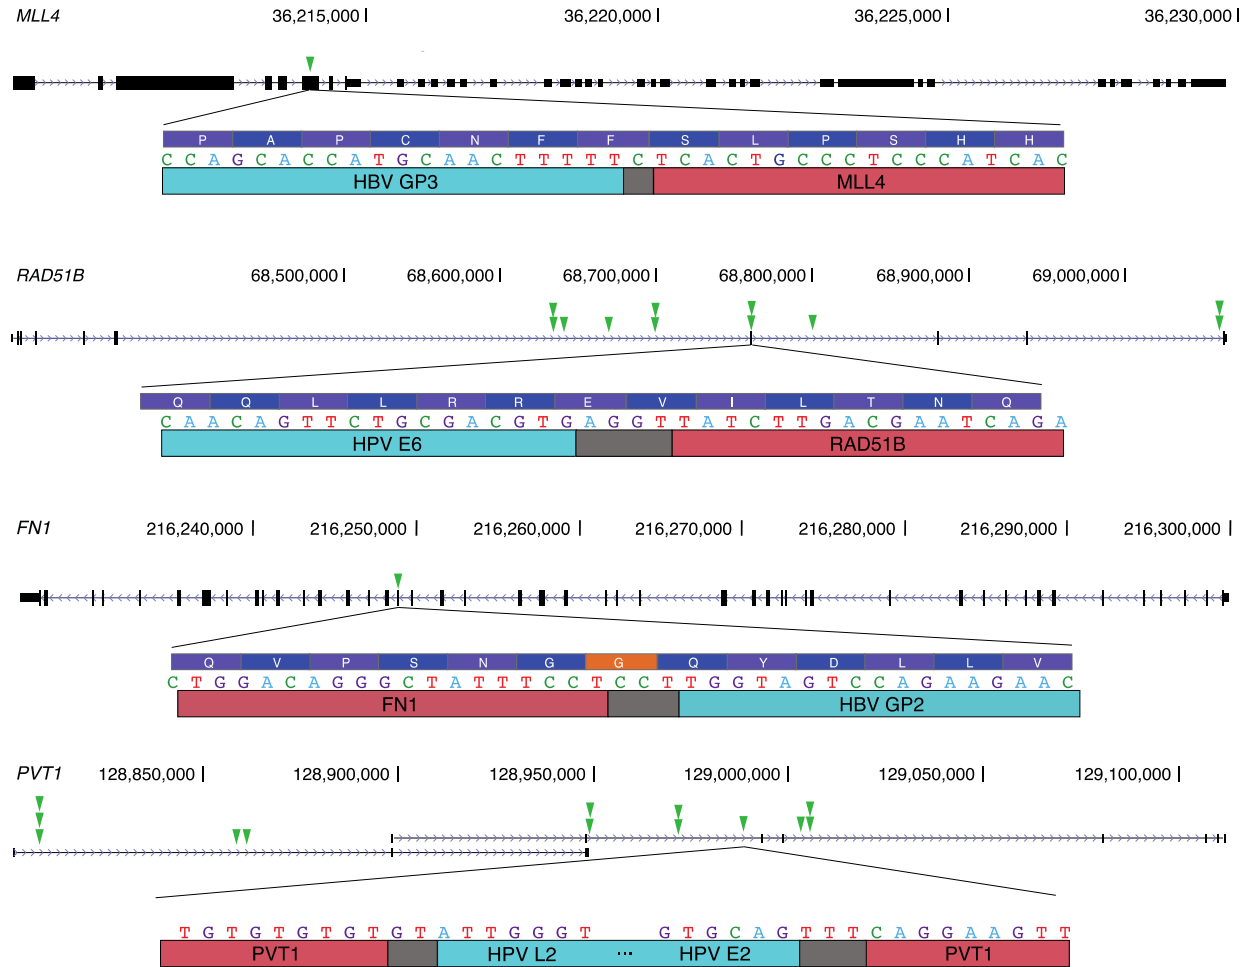

**Supplementary Figure S6. Close-up view of selected fusion sites in recurrent genes.** Green arrows indicate fusion breakpoints that were fine-mapped with the help of breakpoint-spanning reads (as presented in Supplementary Table 5). Close-up views are shown for select cases, including in-frame fusions. Light blue, viral transcript; red, human transcript; grey, possible positions for breakpoint; orange, amino-acid introduced during fusion.

## The landscape of viral expression and integration in human cancer

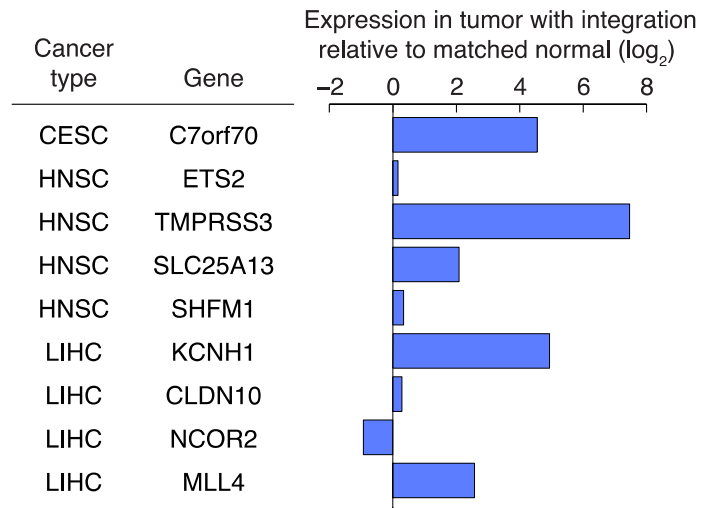

**Supplementary Figure S7. Relative expression of integration target genes in tumors with integration relative to matched normals without integration.** We identified a total of 9 cases of viral integration in gene loci for which a matched normal control without integration in the same gene was available. For these genes and tumors, we calculated relative expression levels in the tumors compared to the normals.

# The landscape of viral expression and integration in human cancer

**a**

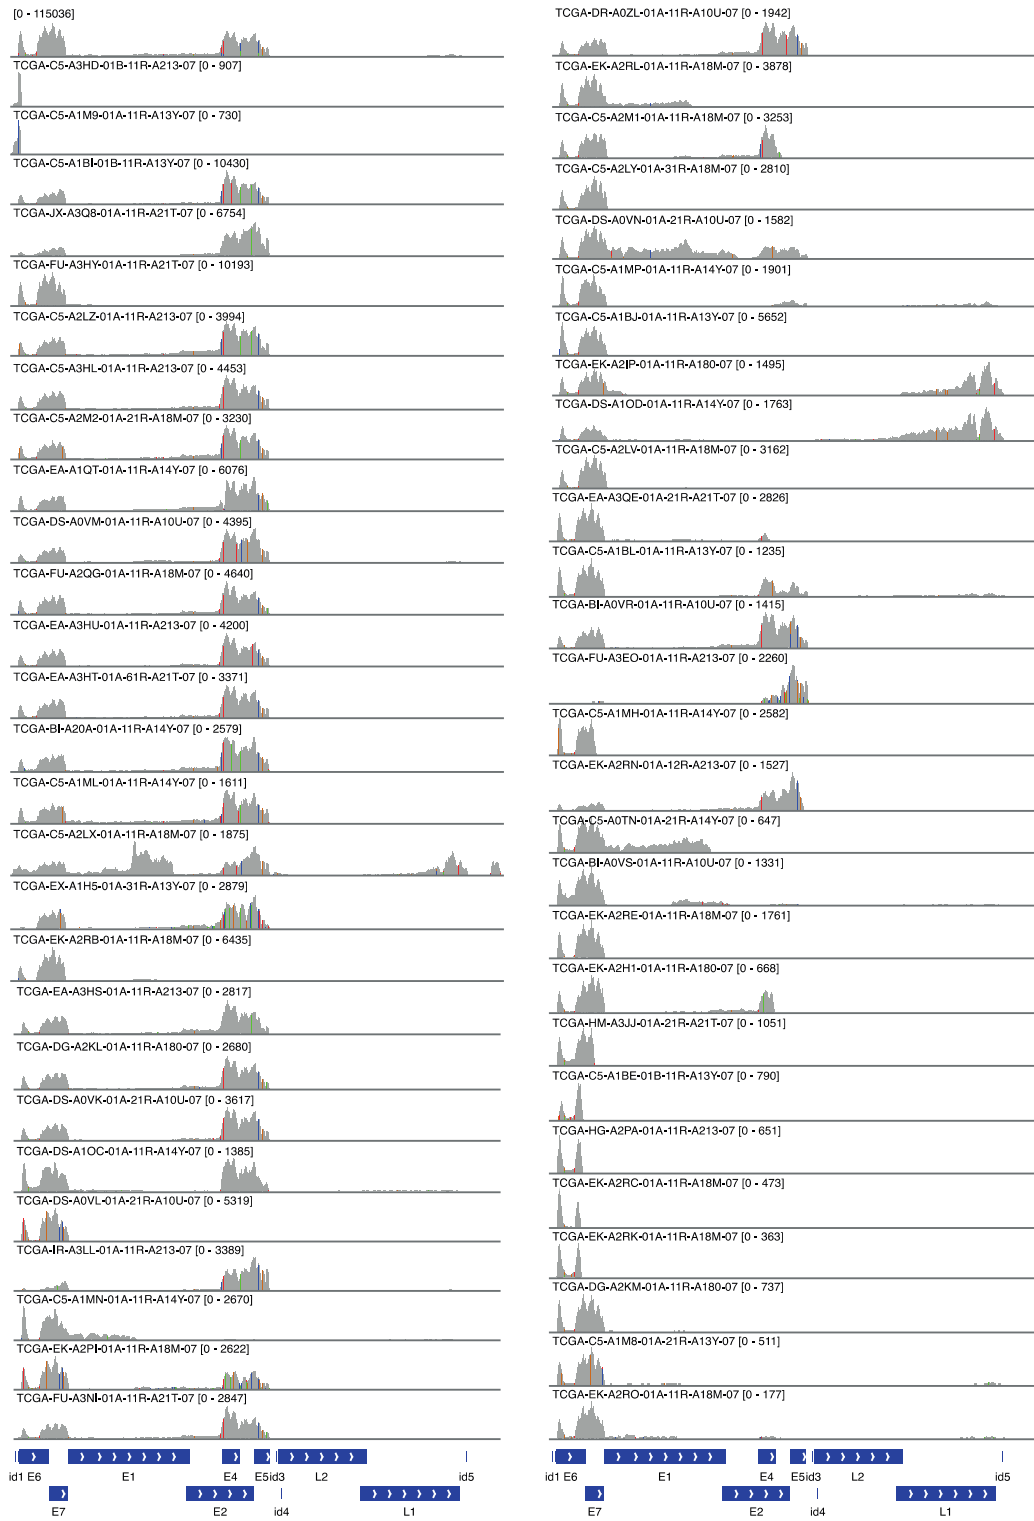



## The landscape of viral expression and integration in human cancer

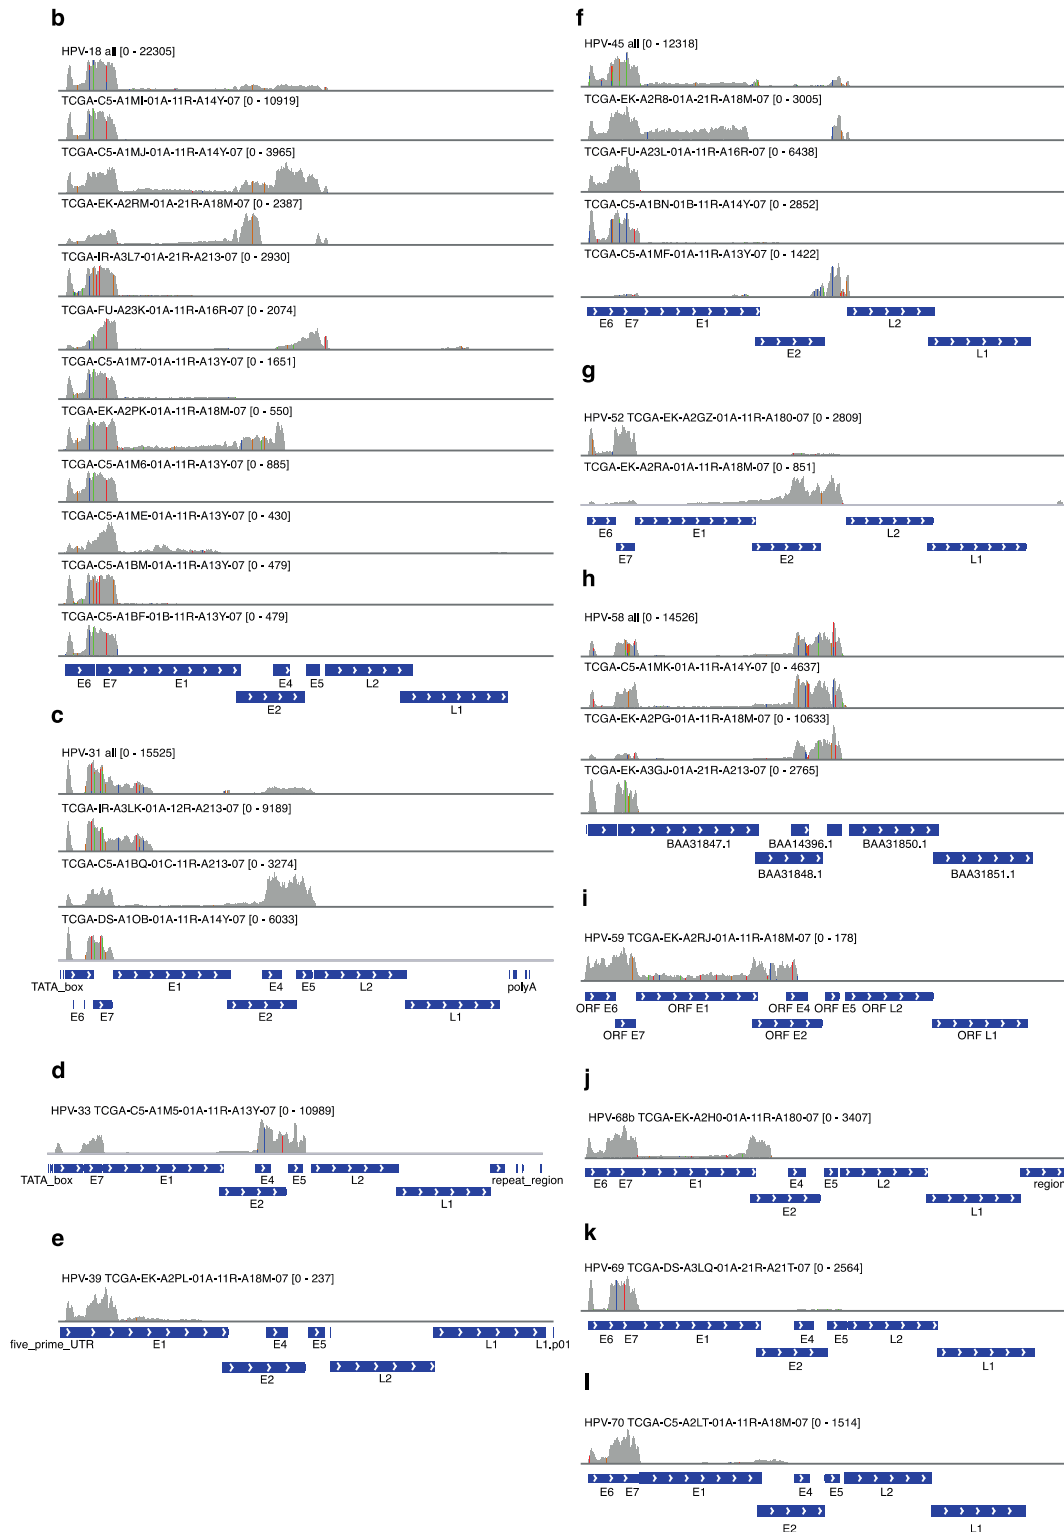

**Supplementary Figure S8. Graphical illustration of viral gene expression patterns in HPV-positive CESC.** HPV positive CESC mRNA aligned to (a) HPV16 (b) HPV18 (c) HPV31 (d) HPV33 (e) HPV39 (f) HPV45 (g) HPV52 (h) HPV58 (i) HPV59 (j) HPV68b (k) HPV69 and (l) HPV70 (Genbank accession numbers found in Supplementary Table S1). Colored rows in mRNA pattern profile represent nucleotide mismatches to reference sequence.

**Supplementary Tables**

| <b>Annotated viruses</b>                                                                                                                                                                                                                                                                                                                                                                                                                                                                                                                                                                                                                                                                                                                                                                                                                                                                                                                                                                                                                                                     |            |
|------------------------------------------------------------------------------------------------------------------------------------------------------------------------------------------------------------------------------------------------------------------------------------------------------------------------------------------------------------------------------------------------------------------------------------------------------------------------------------------------------------------------------------------------------------------------------------------------------------------------------------------------------------------------------------------------------------------------------------------------------------------------------------------------------------------------------------------------------------------------------------------------------------------------------------------------------------------------------------------------------------------------------------------------------------------------------|------------|
| Virus type                                                                                                                                                                                                                                                                                                                                                                                                                                                                                                                                                                                                                                                                                                                                                                                                                                                                                                                                                                                                                                                                   | Genbank    |
| Human papillomavirus type 31                                                                                                                                                                                                                                                                                                                                                                                                                                                                                                                                                                                                                                                                                                                                                                                                                                                                                                                                                                                                                                                 | J04353.1   |
| Human papillomavirus type 33                                                                                                                                                                                                                                                                                                                                                                                                                                                                                                                                                                                                                                                                                                                                                                                                                                                                                                                                                                                                                                                 | M12732.1   |
| Human papillomavirus type 39                                                                                                                                                                                                                                                                                                                                                                                                                                                                                                                                                                                                                                                                                                                                                                                                                                                                                                                                                                                                                                                 | M62849.1   |
| Human papillomavirus type 45                                                                                                                                                                                                                                                                                                                                                                                                                                                                                                                                                                                                                                                                                                                                                                                                                                                                                                                                                                                                                                                 | X74479.1   |
| Human papillomavirus type 52                                                                                                                                                                                                                                                                                                                                                                                                                                                                                                                                                                                                                                                                                                                                                                                                                                                                                                                                                                                                                                                 | X74481.1   |
| Human papillomavirus type 56                                                                                                                                                                                                                                                                                                                                                                                                                                                                                                                                                                                                                                                                                                                                                                                                                                                                                                                                                                                                                                                 | X74483.1   |
| Human papillomavirus type 58                                                                                                                                                                                                                                                                                                                                                                                                                                                                                                                                                                                                                                                                                                                                                                                                                                                                                                                                                                                                                                                 | D90400.1   |
| Human papillomavirus type 59                                                                                                                                                                                                                                                                                                                                                                                                                                                                                                                                                                                                                                                                                                                                                                                                                                                                                                                                                                                                                                                 | X77858.1   |
| Human papillomavirus type 68b                                                                                                                                                                                                                                                                                                                                                                                                                                                                                                                                                                                                                                                                                                                                                                                                                                                                                                                                                                                                                                                | FR751039.1 |
| Human papillomavirus type 69                                                                                                                                                                                                                                                                                                                                                                                                                                                                                                                                                                                                                                                                                                                                                                                                                                                                                                                                                                                                                                                 | AB027020.1 |
| Human papillomavirus type 70                                                                                                                                                                                                                                                                                                                                                                                                                                                                                                                                                                                                                                                                                                                                                                                                                                                                                                                                                                                                                                                 | U21941.1   |
| Human coxsackievirus A22 strain ban99-10427                                                                                                                                                                                                                                                                                                                                                                                                                                                                                                                                                                                                                                                                                                                                                                                                                                                                                                                                                                                                                                  | DQ995647.1 |
| <b>Assembled viruses</b>                                                                                                                                                                                                                                                                                                                                                                                                                                                                                                                                                                                                                                                                                                                                                                                                                                                                                                                                                                                                                                                     |            |
| Assembled genome 1: Coxsackie-like virus                                                                                                                                                                                                                                                                                                                                                                                                                                                                                                                                                                                                                                                                                                                                                                                                                                                                                                                                                                                                                                     |            |
| <p>TAAGGTACCTATTACAATTACTATAGCACCAATGTGCTGTGAGTTTAAATGGGCTCAGATCTCTCACAGTGC<br/>           CTTTCACACAAGGATTACCGGTGATGGCAACACCAGGGTCTAACCAGTTTTTGACATCTGATAACTTCCAA<br/>           TCGCCATGCGCTCTCCAGACTTTGATGTTACTCCCGAGATACACATAACCAGGGGAAGTGAAGAATATGAT<br/>           GGAGCTGGCTGAAATAGATAACAATTATCCCTATGAATGCAGTCCCAACCAAAGTAAATACTATGGAAGCAT<br/>           ATCCAATACCTCTAGCAGCAGGGGTGCAGAATAATAACAAATCCATATTTTTCAATTAGTTTAAAGTCCTGCC<br/>           GCTGATCAGAGATTGTCTAGAACAATGTTAGGTGAAATTCCTAATTACTACACACACTGGACTGGCTCCAT<br/>           TAAATTCACATTCCTATTTTGTGGTAGTATGATGGCCACAGGAAAGTTACTGCTGAGTTACAGCCCCCAG<br/>           GAGCAAACCCCGACGACTAGAAAAGAGGCCATGTTAGGCACACATATTGTGTGGGATTTAGGCTTACAA<br/>           TCCAGTGCAACTATGGTCGCGCCTTGGATTTCAAATGTGAACTACAGGCGTTGTGTCAAAGATGATTTTAC<br/>           AGAAGGTGGTTACATATGCTGCTTCTACCAGACTGCAATTGTAGTGCCTCCAAACACTCCAACGGACATGT<br/>           ATATGCTTGCATTTGTTAGTGCCTGTAATGACTTCTCAGCAAGGCTTTTGAAAGACACTCCATTTGTCGTC<br/>           CAGACCACACCTGTGGCTCGCACTCAGGGGATTGATGATGTTATTGACACAGTCGTAGCTAATGCACTTAA</p> |            |

# The landscape of viral expression and integration in human cancer

GGTGTCCATGCCACAAGTACAAGACACCCG

TCAACTCAAAGAAGTCCCTGCGCTAACTGCTGTTGAGACAGGTGCCACCAGTCAAATAGAGCCTTCAGAT  
GTGATCGAGACGCGCCATGTCATAAACCAAAGGTTAAGATCAGAATGCACCGTAGAATCCTTCTTTGGAAG  
ATCTGCTTGTGTGGCCATAATAGGTTTTGAGCAACAAGAAGCCCACAGACACCAACGGTAAAGAATTGTTTG  
CAACATGGCCTATCTCATATCTAGACACATATCAATTGAGGAGAAAAGTTGGAGATGTTCACTTACTCTAGA  
TTTGACATTGAGATGACTTTTTGTTGTAACAGAGAGATTCTTTACCTCAACATCTGCAGCTGCTAGGGACTA  
TGTATACCAGATCATGTATGTGCCACCAGGTGCCCAATCCCCAGTCGTGG

CAACCCTTCAATATTTTTATACAACCTGGAAATGCCAGTCCAAGGATTTTCGATCCCGTTTGTAGGCATTGCTG  
CAGCTTACTCACACTTTTATGATGGTTTTCTCCGTAGTCCCTTTCAATTCAGTGGATGCTGGTGCATCCAAC  
AAGTATGGCTATTCTTCAGTCAATGACTTTGGCACACTAGCGATCAGGATTGTTAACGAATATGACCCAGT  
AACTATAGATGCAAAAAGTTAGGGTGTACCTCAAACCCAAACATGTAAAAGTGTGGTGCCCCAGACCGCCCA  
GAGCTGTAGCTTACAATGGACCAACTGTGAACTTTTCAAAAACCCATCAGTCATGACACAGGTTGCTGAT  
ATCAGAACTTATGGATTTGGACATCAAAAACAAAGCAGTCTACACTGCTGGGTACAAAATTTGTAATTATCA  
TTTAGCCACACCTGAAGACATGGAAAAAGCTGTCAATATCATGTGGGACAGAGATCTCCTAGTCTGTGAGA  
GTGGTGTCAAGGCACCGATACCATTGCAAGGTGTTTCATGCAAAGCAGGAGTCTACTATTGTGAGTCTAAA  
AGAAAAGTATTATCCAGTTACGGTTTTGTGGACCCACATTCCAGTATATGGAGGCTAATGACTTCTACCCACC  
TAGATATCAATCCACATGTTAATTGGTTATGGCTTTGCCAACCTGGTGAC

CAACATGGAGTAATGGGCATCATTACTGCTGGTGGTCAAGGGGTTGTGGCTTTTGCAGACATTAGGGATTT  
GTACATGTATGAGGAGGAAGCTATGGAACAAGGTGTTTCAGACTATGTTAATAGGTTAGGAATGGCATTG  
GTGCCGGTTTTAGTGCTGAAGTAGCAAACAAAATTTTCAGAGATTCAAACCACGGTCCAGAGTGTCTTTACA  
GAAAAGCTCCTGAAGAATCTAATAAAAATTTGTTTCAGCTCTTGTATTGTTGCCAGAAATATGAAGATTC  
GATTACAGTACTAGCCACACTTTCTCTATTAGGATGTGACGCCTCGCCGTGGCAATGGCTCAAGGAAAAAC  
TCTGTAATATGATTGGCATCCCCACGTCATGAAACAAGGAGATACTTGGCTAAAAAAGTTCACAGAAGCT  
TGCAATGCCGCCAAGGGGCTGGAGTGGATTGCAATAAAAATTAGTAAATTTATAGATTGGATCAAGGAGAA  
AGTGCTCCCAGAGGCAAAGGACAAATTTGGAGTATCTTTCAAAGATGAAACAACCTTGAATGATAGAAAACC  
AGATGGCCACGTTACATCAATCATGCCCTAGCCAAAGAAGAGCAGGAAGTCTCTTTAACAACATCAGATGG  
TTAGCAATAAAGGCAAGAAAGTTTGCGCCCTTGTATGCAGCTGAGGCCCGTAGAATATTTAAGCTAGAAAC  
ATCCATCAACAATTATGTACAATTCAGACCAAACACCGCATTGAACCAGTATGTTTGTGATTTCATGGAA  
CCCCCGGTACAGGCAAGTTCGGTTGCTACAGGCCTCATTGGAAGATCAATTGCAAAGCAAGCAAACACCAGT  
ACTTATTCACTGCCCCCGGATCCTTACATTTTTGATGGCTATAAGCAACAGGGAGTTGTGATTATGGATGA  
CCTGAACCAAACCCAGATGGGGAAGATATGAAGTTGTTTTGTCAAATGGTCTCCACAGTGGAGTTCATAC  
CACCAATGGCCAGCTTGGAGGAAAAGGGAATATTGTTACCTCAGATTATGTGCTTGCTTCCACCAATTCT  
AACACAATAACACCTCCACAGTATCAGCATCTGATGCATTATCTAGAAGATTTGCTTTTTGACATGGACAT  
A

ATACCCAATGTCTGAATATACAACAAAAGGAAAGTTGAACATGGCTTTGGCTACCCAATTGTGTAAAGACT  
GCCATAAACCAGCAAACCTTCTCTACATGCTGCCCTTGGTGTGTGGGAAAGCTATTCAATTGATGGACAAA  
AATACCAGGATGAGATACTCTCTGGACCAGATTACCACTATGATGATTAACGAGAGAAATAGGAGGTACAA  
CATTGGAGGCTGCTTAGAGGCACTATTCCAAGGCCAATTGAATTCAAAGATCTCAAGATCGATGTGGTTTT  
CCACACCACCGCCCTCAGCAATATCAGACCTGCTCAAATCAGTAGATAATCAGGAGGTTAGGGATTATTGC  
AAACAACAGGGTTGGGTGGTGGAGATCCCTTCAAATCTGTACCATTGAAAGACACATCTCCCGTGCAAC  
TAGTATTTTACAATCACTCTCCACTTTTGCAGTGGTGGCGGGTATGGTCTATGTAGTTTACAACTTTTTG  
CAGGATTTCAGGGCGCATACACAGGACTCCCTAATGCAAAAACAAAAATCCCTACAATTAGAGCAGCCAAA  
GTTCAAGGACCTGATTTGATTATGCAGTTGCCATGGCTAAGAAGAATATACTCACTGCTACCACAGAGAA  
GGGTGAATTCACAATGCTGGGTGCTATGACAGGGTAGCTGTGCTTCTACTCACTCAAACCCAGGTGAAA  
CCATAGTTTATATCAGGAAAAGAAGTGAAGATCTTAGATGCTAAAAGATTAGTTGATAGTATGAAGTTAAC  
CTTGAAATTACTATTGTAACCTTAGACAGAAATGAAAAGTTTAGGGATATTAGAACTCACTTACCAACCCA  
AATCCATGAAACTAATGATGCAGTCCTTGCCGTAAACACCTCCAAATTTCTAACATGTACATTCCAGTTG  
GATCAGTTATCGAACAGGGTATGCTAAATCTTGGGGGTAGGCCCAACAACAGAACCTTGATGTATAACTTC  
CCAACCAAGGCAGGACAGTGTGGTGGTGTCTGATGGCAACTGGCAAAGTATTGGCATAACGTTGGTGG  
CAATGGATCACATGGTTTTGCTGCCGCTCTCAAGAGAAGTTACTTCACTGAAGAACAAGGGGAGATCCAGT  
GGATGAGGCCAAGCAAAGATGCAGGTTATCCCATGATTAATGCACCCTCAAAGACAAA

AAACTAGAACCTAGTGTCTTTCTTTGATGTTTTCCAGGAGAAAAGAACCAGCTGCTTTAACCAAGATGA

# The landscape of viral expression and integration in human cancer

TCCTAGACTGAAAGTTGATTTTCGAAGAAGCCGTCTTTTCCAAATACATTGGGAATAAAAATTACAGAGGTGG  
ATGAGTACATGAAGGAGGCTGTTCGATCACTATGCTGGTCAGCTGATGTCCCTTGATATACCTACAGAACAG  
ATGTGCCTGGAGGATGCCATGTATGGCACAGATGGTCTTGAAGCCCTAGATTTGACAACCTAGTGTGGGTA  
CCCCTATGTGGCTATTGGAAA  
GAAAAAGAGAGACATTCTCAACAAACAAACACGAGACACCAAAGAAATGCAGAAAATGTTAGATAAAATATG  
GAATAAATCTACCATTGGTGACTTATGTTAAAGATGAACTTAGATCCAAATCAAAAAGTGGAAACAGGGTAAA  
TCTAGATTGATTGAAGCAAGCTCTTTGAATGATTCCGGTTGCTATGAGACAGGCTTTTGGTACCTATATGC  
CAAGTTTCACCAGAATCCAGGGATAATAACAGGCTCTGCAGTGGGGTGTGACCCAGATGTCTTCTGGAGTA  
AGGTGCCAGTGTGTTAGATGGGAACTCTTTGCTTTTGATTACACAGGTTATGATGCTTCACTCTCTCCA  
GCTTGGTTTGAAGCCTTGAAAATGGTACTGGAAAAGATTGGCTTTGGTGTATCGAGTTGACTTCATAGACTA  
CTTAAATCACTCACACCACTTATACAGGAACAAATTATACTGTGTTAAAGGTGGAATGCCCTCAGGGTGTCT  
TTGGCCTCAATATTCAATTCCATGATCAATAACTTGATAATTAGGACACTAATGTTAAAAACTTACAAA  
GGGTGGATCTAGACTCTCTCCGTATGGTAGCATACGGGGATGACGTCATTGCATCCTACCCACACAAAAT  
TGATGCTGGCCTCCTAGCCCAAGCAGGAAAAGACTATGGATTAGTCATGACACCAGCAGATAAGGGTGCTA  
CCTTACAGATGTGGATTGGAGCAATGTAACATTCCTCAAAAAGATTCTTCAGAGCAGATGAGCAGTATCCT  
TTCCTTGTTCACCCAGTGTATGCCATGAAAGACATTTATGAATCAATCAGGTGGACCAAAGATCCACGAAA  
CACACAGGATCATGTCCGATCATTATGCTTATTGGCTTGGCACAATGGAGAAGAACTTATAACAAATTCC  
TAGCTCAAATTAGAAGCGTGCCAGTTGGCCGTGCTCTACTCCTACCGGAGTATTCTACTCTGCGCAGGCGC  
TGGCTCGATTCTTTTTAGAGTGACCCTACCTCACCCGAATTGGCTTGGGTATGGTGTGTAGGGGTAAT  
TTTCTTTTAATTCGG

## Assembled genome 2: Mosaic-like virus

GCTCCTATGGAGTGGCGGGGGAGCCATCACAGCTCTCACCACCACCAAGCATCTTGGGAGTAAACTCGTG  
CTCGGAGTCCTAACCGCTGCTAGCATCTATTGTGCAGTCCAGTTGCACATATATGTTTTCGTTGGCTAAAAG  
GCGGCAATTCGATAAGACTCGGTCGGACTTCCTTGAACAACAATACCAGGACATCCTCAAATCAATGGAGG  
AGCAGAAAAGAAAGGGCAACCAGAGAACGGCTAGAAGACTGCCTCACCAAGGAAGTGTGGAACCGGCCCAA  
TTAGCAGAAGACGGAAGTGTGCTTAAACAAGAAGTGGCACAATACCTTGTCCACGAACACGGTAAGTTTGT  
CAGGGCCTTAGTCTGCGAGGCTAAGATGGAATTTGGGGGAACCCCAAAGACCACCGAAGCCAACCAACTTG  
CTGTATGGAGGTTCTGTACCGAACCTGCGACAAGAGAGGGTGAATCCAGCTGATGCTCAAAGAAGTATC  
ACAGCTGCCCTTCCATTTCGTCTTCTTGGCCAGTGCCTATGACGAGTCTGCTGCTATCGGGAGAACTTCAGA  
GGAGACTGCAGAGGCTCTTCGTAGGTACAAGTCTCAATTCACCCAAGACACACCCTTCAAAAATTAGTGT  
GCAACCCGCTTTCAGGGAAAGCTTGGAGGGCATGGGCACGTAACGTGTTCTATGGAGACCAGG

GAGAGTTGGACGAAGGTCTCCCATATCGTATGAGAAGTTCCTTTCTACTACACTGGTGGTAAACTCACTA  
CGTATAGTAGGGCTGTTGATTCCCTCACTGAACGACCAGTCAACAAGGCTGACGCCAAGCTCTCGACATTT  
GTCAAAGCGGAGAACTAAACTTGTCTCTGAAGTCTGATCCAGTCCCGCGTGTATCCAACCCAGACACCC  
CAGGTACAATGTGGAAGTTGGTAGATATCTCAAACCAATAGAGCAGCAGATCTACACTGCTATCGACGGGT  
TATTTGGGTCCAAAACATTTTCAAGGGACTGTCTGTGCGAGGCAATGGGTTCTCTGATCCACCAGAAAATG  
CGCAAATTTGAGGCGGTGCGCTATTGGATTGCGAGCCTCTCGCTTCGACCAACACGTGTCTGTAGATGC  
TCTGAAGTATGAACACTCCATTTACAAGGGAATCTATTCCCCTCAAAAACCCTCAACACCCTACTCAAAT  
GGCAGATCCATAACAAAGGGGTGGCAATCGCAAAGGATGGGTTTTTCCGATATTCTGTGGATGGGTGCC

GCTGAACTCATCAACAACGGTGTATGACAATGTGTTAATTTGCTCGGAGGATGATGAGGAAGTAGTGAAGAG  
ACACTTGTATGATCACTGGCTCAAGTATGGGTTTGAAGTGGTTGCGGAAGAGCCTGTATATATAACAGAAC  
AAGTAGAGTTTTGCCAGATGAAGCCTGTGTTTATGGAACCAACTACGTCATGGTTTCGGAACCCGATGTC  
TCGATGTCCAAAGATTGTCATAGCATACCCCATTTTACACTACCAAACCTGCCAAGAAGTGGGTGCATGC  
CGTCGGAGAATGTGGGCTATCTCTAACTGGAGGCATACCAATCAAGCAAGAGTATTACACGTGTATGATCA  
GAAATGGCGACCAACATGGGGAAATTGACAAAAGTAAGGAGTTCAATTCAGGGTTTACTCGGCTCAGCAAG  
TGCAGCAATCGCAAGTATCGACAAATTTCTAGCGAGACCCGATACTCGTTCTACCTGGCCTTTGGTTACAC  
ACCAGACGAACAGGTAGCTATCGAGAACTACTTCCGGACGCTAGAGTTGCCATGGCACTATGGGCTGTCCG  
GTACTCCGGCAAGAGCACCTGAATGTCTACTCCTAACTACGATCCCCCAACCACCGACGTTCAACAAGTCA  
ACACCACAAAGGACCCACGAGCCCAGCGACAATCAAGCAGGCAACAACCTCGCGCACAGCGCCAGCAGAGCA  
GTGGGACAGAGGACTAACAGTTCTCAGGACACTCGCTGCCAATTTCTGATTGTCGCGCAAAAGGGTCTGA  
AGTCAACCAACAATTTCAACTTCTAGGCTGGCTACAGGTAAGTGCCACTGTCCAGATTCTCTCTGGACCA  
GGACTGCTTGCATCTGCATAGTCTTAGCCCTTTGCTTGGTGGCTAGATCCACATCTGAACCTCCCATCAT  
CTCACCTCCAGTCTTCCATACTGTATACCATTGTGAGAAATACCAGAACATCGAGGTTTCAGAAATGAATGG

## The landscape of viral expression and integration in human cancer

```
CTCCCGTGGTCGTCGTCACAACCTGCCCCCTCCCGAACAGTGGCGGCCAGAGAAATCAAGGTTCTCGGC  
GCAAGAGTCGTAGAAAGCAGATCTGTGGAACGAGCAATGCCAGTTGCCACCTCGTACTCTGTGGGTCCGACG  
GGACCCCGGGCATGGGGAGTAGACAGGGATGGACAAGTTTGGCTCACAAGGAAGTCATACTTCAAGTCAC  
TGCTAGTACCAGCAGTGACACCATACTCACCATCCCCGTCAATCCAAACCTGCTCTATCCGCCAGACAGTA  
CGACTTATTCCGGACGTGCGAAATTCCTCGCAGGGCAGCCCCACTGTACTCCCAACACAAATGGGACATG  
TTGGCATTCCAATGGACACCAAGTTGTCCAACGACTACACCTGGAAACGTGGTTTTGAGGTTTCATACCCAA  
CTACACCAGCCAACACCAACCAACATGTTAGACACAATGGACAGT
```

**Supplementary Table S1. Additional missing genomes added to complement the RefSeq viral genome database.** Annotated viruses with Genbank accession numbers (top panel) and assembled viruses with contig-sequences (bottom panel).

## The landscape of viral expression and integration in human cancer

| TCGA cancer abbr. | Libraries | Unique samples | Unique tumors | Unique normals | Unique patients | Read length (nt) | Total reads | Average reads per library | Total non-human reads | Average non-human reads | Fraction non-human candidate reads (%) | Total viral aligned reads |
|-------------------|-----------|----------------|---------------|----------------|-----------------|------------------|-------------|---------------------------|-----------------------|-------------------------|----------------------------------------|---------------------------|
| BLCA              | 109       | 109            | 96            | 13             |                 | 96 2x48          | 1.74E+10    | 1.59E+08                  | 1.17E+08              | 1.07E+06                | 0.7                                    | 160094                    |
| BRCA              | 914       | 914            | 810           | 104            |                 | 805 2x50         | 1.55E+11    | 1.69E+08                  | 2.11E+09              | 2.31E+06                | 1.4                                    | 3722                      |
| CESC              | 89        | 89             | 87            | 2              |                 | 87 2x48          | 1.68E+10    | 1.89E+08                  | 1.99E+08              | 2.24E+06                | 1.2                                    | 3232205                   |
| COAD              | 196       | 194            | 194           | 0              |                 | 194 1x51         | 5.07E+09    | 2.59E+07                  | 2.30E+08              | 1.17E+06                | 4.5                                    | 26745                     |
| GBM               | 169       | 167            | 167           | 0              |                 | 161 2x76         | 2.28E+10    | 1.35E+08                  | 1.67E+09              | 9.89E+06                | 7.3                                    | 635                       |
| HNSC              | 345       | 341            | 304           | 37             |                 | 304 2x48         | 5.97E+10    | 1.73E+08                  | 2.84E+08              | 8.24E+05                | 0.5                                    | 1540524                   |
| KIRC              | 519       | 519            | 453           | 66             |                 | 462 2x50         | 9.18E+10    | 1.77E+08                  | 1.70E+09              | 3.27E+06                | 1.9                                    | 9461                      |
| KIRP              | 74        | 74             | 59            | 15             |                 | 62 2x48          | 1.32E+10    | 1.78E+08                  | 6.96E+07              | 9.41E+05                | 0.5                                    | 661                       |
| LAML              | 167       | 167            | 167           | 0              |                 | 167 2x50         | 2.08E+10    | 1.25E+08                  | 6.92E+08              | 4.14E+06                | 3.3                                    | 2823                      |
| LIHC              | 54        | 54             | 34            | 20             |                 | 36 2x50          | 8.07E+09    | 1.49E+08                  | 6.36E+07              | 1.18E+06                | 0.8                                    | 433531                    |
| LUAD              | 413       | 412            | 355           | 57             |                 | 355 2x48         | 6.04E+10    | 1.46E+08                  | 3.77E+08              | 9.14E+05                | 0.6                                    | 2494                      |
| LUSC              | 238       | 237            | 220           | 17             |                 | 221 2x50         | 4.29E+10    | 1.80E+08                  | 4.07E+08              | 1.71E+06                | 0.9                                    | 25623                     |
| OV                | 420       | 419            | 419           | 0              |                 | 413 2x75         | 7.74E+10    | 1.84E+08                  | 1.93E+09              | 4.60E+06                | 2.5                                    | 6854                      |
| PRAD              | 179       | 179            | 140           | 39             |                 | 142 2x48         | 2.99E+10    | 1.67E+08                  | 1.19E+08              | 6.66E+05                | 0.4                                    | 484                       |
| READ              | 71        | 71             | 71            | 0              |                 | 71 1x76          | 1.90E+09    | 2.68E+07                  | 7.52E+07              | 1.06E+06                | 4.0                                    | 1403                      |
| SKCM              | 249       | 249            | 249           | 0              |                 | 247 2x48         | 4.20E+10    | 1.69E+08                  | 1.41E+08              | 5.67E+05                | 0.3                                    | 4642                      |
| STAD              | 43        | 43             | 43            | 0              |                 | 43 2x50          | 6.67E+09    | 1.55E+08                  | 5.50E+07              | 1.28E+06                | 0.8                                    | 57463                     |
| THCA              | 279       | 279            | 249           | 30             |                 | 261 2x48         | 5.07E+10    | 1.82E+08                  | 5.36E+08              | 1.92E+06                | 1.1                                    | 935                       |
| UCEC              | 321       | 320            | 316           | 4              |                 | 316 1x76         | 1.00E+10    | 3.12E+07                  | 5.07E+08              | 1.58E+06                | 5.1                                    | 9450                      |

**Supplementary Table S2. Additional statistics and information about RNA-seq libraries included in this study.** RNA-seq libraries were generated by the TCGA using the Illumina TruSeq protocol, on tissue samples selected based on stringent quality requirements (>80% or >60% tumor nuclei, see <http://cancergenome.nih.gov/cancersselected/biospeccriteria>). Paired-end data was generated on the Illumina HiSeq 2000 platform, while single-end reads (COAD, READ, and UCEC) were generated on the Illumina Genome Analyzer Iix. Read lengths varied between 48 and 76 nt, but were quality-trimmed before further analysis as described in Methods.

The landscape of viral expression and integration in human cancer

| ID                                               | HBV genotype |
|--------------------------------------------------|--------------|
| TCGA-BC-A10W-01A-11R-A131-07<br>Contig: "17270"  | C2           |
| TCGA-CC-5258-01A-01R-A131-07<br>Contig: "15238"  | B4           |
| TCGA-CC-5258-01A-01R-A131-07<br>Contig: "15244"  | B4           |
| TCGA-CC-5262-01A-01R-A131-07<br>Contig: "8683"   | B            |
| TCGA-CC-5262-01A-01R-A131-07<br>Contig: "8685"   | B            |
| TCGA-CC-5263-01A-01R-A131-07<br>Contig: "12025"  | B            |
| TCGA-CC-5263-01A-01R-A131-07<br>Contig: "12029"  | B            |
| TCGA-CC-5263-01A-01R-A131-07<br>Contig: "12051"  | B4           |
| TCGA-CC-5264-01A-01R-A131-07<br>Contig: "10755"  | C1           |
| TCGA-DD-A119-01A-11R-A131-07<br>Contig: "14856"  | B2           |
| TCGA-DD-A119-01A-11R-A131-07<br>Contig: "14860"  | B2           |
| TCGA-DD-A1EI-01A-11R-A131-07<br>Contig: "21462"  | C2           |
| TCGA-DD-A1EI-01A-11R-A131-07<br>Contig: "21452"  | C2           |
| TCGA-DD-A1EL-01A-11R-A155-07<br>Contig: "3970"   | A            |
| TCGA-DD-A1EL-01A-11R-A155-07<br>Contig: "3974"   | A2           |
| TCGA-CC-A1HT-01A-11R-A131-07<br>Contig: "112109" | E or G       |
| TCGA-CC-A1HT-01A-11R-A131-07<br>Contig: "112077" | C or B       |
| TCGA-CC-A1HT-01A-11R-A131-07<br>Contig: "112009" | C5           |
| TCGA-DD-A1EA-01A-11R-A131-07<br>Contig: "13008"  | C1           |

The landscape of viral expression and integration in human cancer

|                                                        |    |
|--------------------------------------------------------|----|
| TCGA-DD-A1EA-01A-11R-A131-07<br>Contig: "12958"        | C1 |
| TCGA-DD-A116-01A-11R-A131-07<br>Contig: "25740"        | C2 |
| TCGA-AK-3455-01A-01R-0864-07 (KIRC)<br>Contig: "18800" | C1 |
| TCGA-AK-3455-01A-01R-0864-07 (KIRC)<br>Contig: "18810" | C1 |

**Supplementary Table S3. HBV genotype classification.** Contigs assembled from HBV-positive LIHC and KIRC were phylogenetically analysed. Individual phylogenetic trees were constructed by maximum likelihood analysis after bootstrapping to 1000 replicates using the MEGA5 software (Tamura-Nei substitution setting, bootstrap values shown at nodes). The comparison includes published sequences representing all HBV genotypes and relevant subgenotypes.



## The landscape of viral expression and integration in human cancer

| TCGA barcode | RNAseq-based clusters, >= 10 unique reads required |                        |              |                    | WGS-based clusters, >=2 unique reads shown, low-confidence clusters (<4) displayed in italic |                                 |            |              |             |                 |
|--------------|----------------------------------------------------|------------------------|--------------|--------------------|----------------------------------------------------------------------------------------------|---------------------------------|------------|--------------|-------------|-----------------|
|              | Position                                           | Width                  | Unique reads | Total reads in WGS | Support                                                                                      | Position                        | Width      | Unique reads | Total reads | RNA-seq overlap |
| TCGA-BA-4077 | chr14:68699685-68700029                            | 344                    | 111          | 485                |                                                                                              | chr14:68699686-68699986         | 300        | 25           | 26          | Yes             |
|              | chr14:68701635-68701835                            | 200                    | 77           | 579                |                                                                                              | chr14:68741265-68741699         | 434        | 64           | 82          |                 |
|              | chr14:68703891-68704286                            | 395                    | 121          | 865                |                                                                                              |                                 |            |              |             |                 |
|              | chr14:68706681-68706868                            | 187                    | 35           | 49                 |                                                                                              |                                 |            |              |             |                 |
|              | chr14:68741465-68741699                            | 234                    | 39           | 77                 | Yes                                                                                          |                                 |            |              |             |                 |
|              | chr14:68758598-68758699                            | 101                    | 38           | 146                |                                                                                              |                                 |            |              |             |                 |
|              | chr14:68878139-68878302                            | 163                    | 33           | 104                |                                                                                              |                                 |            |              |             |                 |
|              | chr14:68963844-68964298                            | 454                    | 22           | 28                 |                                                                                              |                                 |            |              |             |                 |
| TCGA-BA-5153 |                                                    |                        |              |                    |                                                                                              | <i>chr1:246154478-246154615</i> | <i>137</i> | <i>2</i>     | <i>2</i>    | <i>No</i>       |
| TCGA-BA-5558 |                                                    |                        |              |                    |                                                                                              | <i>chr1:177235263-177235316</i> | <i>53</i>  | <i>2</i>     | <i>2</i>    | <i>No</i>       |
| TCGA-BA-5559 | chr1:67217967-67218254                             | 287                    | 17           | 18                 |                                                                                              | chr1:67229037-67229256          | 219        | 7            | 7           |                 |
|              | chr1:67220192-67220460                             | 268                    | 38           | 79                 |                                                                                              | chr1:67229822-67230084          | 262        | 12           | 12          | Yes             |
|              | chr1:67221328-67221428                             | 100                    | 16           | 18                 |                                                                                              | chr1:67230867-67231062          | 195        | 4            | 4           |                 |
|              | chr1:67229016-67229254                             | 238                    | 52           | 97                 |                                                                                              |                                 |            |              |             |                 |
|              | chr1:67229674-67230085                             | 411                    | 46           | 91                 | Yes                                                                                          |                                 |            |              |             |                 |
|              | chr1:67230825-67231081                             | 256                    | 16           | 21                 |                                                                                              |                                 |            |              |             |                 |
|              | chr1:67231402-67231610                             | 208                    | 18           | 23                 |                                                                                              |                                 |            |              |             |                 |
|              | chr1:67236068-67236326                             | 258                    | 84           | 290                |                                                                                              |                                 |            |              |             |                 |
|              | chr1:67241961-67242088                             | 127                    | 13           | 16                 |                                                                                              |                                 |            |              |             |                 |
| TCGA-BB-4223 |                                                    |                        |              |                    |                                                                                              |                                 |            |              |             |                 |
| TCGA-BB-4225 | chr2:89156699-89157141                             | 442                    | 15           | 18                 | No*                                                                                          |                                 |            |              |             |                 |
| TCGA-CN-4741 | chr11:76091791-76091920                            | 129                    | 17           | 29                 | Yes                                                                                          | chr11:76087547-76087873         | 326        | 8            | 8           |                 |
|              | chr13:73619740-73619879                            | 139                    | 19           | 55                 | Yes                                                                                          | chr11:76095856-76096214         | 358        | 23           | 24          | Yes             |
|              | chr3:189239616-189239981                           | 369                    | 58           | 140                | Yes                                                                                          | chr13:73619741-73619860         | 119        | 5            | 5           |                 |
|              |                                                    |                        |              |                    |                                                                                              | chr13:73620066-73620338         | 272        | 16           | 17          | Yes             |
|              |                                                    |                        |              |                    | chr3:189239695-189239981                                                                     | 286                             | 7          | 7            | Yes         |                 |
| TCGA-CV-5971 | chr5:84619761-84620324                             | 563                    | 26           | 46                 | Yes                                                                                          | chr20:33629909-33630290         | 381        | 49           | 55          | No              |
|              | chr5:84624624-84625143                             | 519                    | 111          | 398                |                                                                                              | chr20:33638325-33638718         | 393        | 40           | 45          |                 |
|              |                                                    |                        |              |                    |                                                                                              | chr21:30912638-30912969         | 331        | 13           | 13          | No              |
|              |                                                    |                        |              |                    |                                                                                              | <i>chr21:30933491-30933624</i>  | <i>133</i> | <i>2</i>     | <i>2</i>    |                 |
|              |                                                    |                        |              |                    |                                                                                              | chr5:84619616-84620400          | 784        | 20           | 21          | Yes             |
| TCGA-CV-6939 | chr7:95783231-95783547                             | 316                    | 36           | 43                 | Yes**                                                                                        | chr7:96291514-96291703          | 189        | 4            | 4           | Yes             |
|              | chr7:96251630-96251952                             | 322                    | 46           | 68                 |                                                                                              |                                 |            |              |             |                 |
|              | chr7:96274882-96275252                             | 370                    | 77           | 159                |                                                                                              |                                 |            |              |             |                 |
|              | chr7:96279540-96279832                             | 292                    | 29           | 40                 |                                                                                              |                                 |            |              |             |                 |
|              | chr7:96282120-96282524                             | 404                    | 19           | 22                 | Yes                                                                                          |                                 |            |              |             |                 |
|              | chr7:96285739-96285900                             | 161                    | 15           | 19                 |                                                                                              |                                 |            |              |             |                 |
|              |                                                    | chr7:96291613-96291706 | 93           | 13                 | 18                                                                                           |                                 |            |              |             |                 |

\*Known integration locus (IGKC gene)

\*\*Supported by one discordant read pair in WGS

**Supplementary Table S4. Comparison of integrations detected using RNA-seq with DNA-level results in 9 virus-positive HNSC tumors with available whole-genome sequencing data.** 9 HPV-positive HNSC tumors had available low/medium-coverage whole-genome sequencing (WGS) data (297.4 to 557.9 million reads per sample). WGS datasets were processed with the same pipeline used for RNA-seq. 8/9 RNA-seq-based integrations were supported by at least one discordant read pair in WGS. WGS-based clusters with >=2 unique reads are indicated in the table. Integration clusters were grouped by genomic locus (indicated by light/dark blue).

## The landscape of viral expression and integration in human cancer

| Gene      | Virus:gene | Hg19 gene:region   | Hg19 breakpoint | Virus breakpoint | Correct orientation | Frame        | Fused viral end | Sample ID       |
|-----------|------------|--------------------|-----------------|------------------|---------------------|--------------|-----------------|-----------------|
| MLL4      | HBV:GP3    | MLL4: Exon         | chr19:36214028  | 1827             | Yes                 | In-frame     | 3'              | TCGA-CC-5258-01 |
| FN1       | HBV:GP2    | FN1: Exon          | chr2:216248908  | 460              | Yes                 | In-frame     | 3'              | TCGA-BC-A10W-11 |
| PVT1      | HPV:E2     | PVT1:Intron        | chr8:128869002  | 3821             | Yes                 | Non-coding   | 5'              | TCGA-BB-7866-01 |
|           | HPV:E1     | PVT1:Exon          | chr8:128867401  | 883              | Yes                 |              | 3'              | TCGA-BB-7866-01 |
|           | HPV:L2     | PVT1:Intron        | chr8:128993412  | 4385             | Yes                 |              | 5'              | TCGA-C5-A1M9-01 |
|           | HPV:E2     | PVT1:Intron        | chr8:128993412  | 3117             | Yes                 |              | 3'              | TCGA-C5-A1M9-01 |
|           | HPV:E1     | PVT1:Intron        | chr8:128944606  | 881              | Yes                 |              | 3'              | TCGA-C5-A1M9-01 |
|           | HPV:E6     | PVT1:Intron        | chr8:128944606  | 227              | Yes                 |              | 3'              | TCGA-C5-A1M9-01 |
|           | HPV:E1     | PVT1:Exon          | chr8:129001407  | 881              | Yes                 |              | 3'              | TCGA-C5-A1M9-01 |
|           | HPV:E6     | PVT1:Intron        | chr8:129001858  | 217              | Yes                 |              | 5'              | TCGA-C5-A1M9-01 |
|           | HPV:E1     | PVT1:Intron        | chr8:129001858  | 880              | Yes                 |              | 5'              | TCGA-C5-A1M9-01 |
|           | HPV:L2     | PVT1:Exon          | chr8:128806916  | 4911             | Yes                 |              | 5'              | TCGA-C5-A2M1-01 |
|           | HPV:E2     | PVT1:Exon          | chr8:128806916  | 3739             | Yes                 |              | 5'              | TCGA-C5-A2M1-01 |
|           | HPV:E1     | PVT1:Intron        | chr8:128978455  | 2118             | No                  |              | 5'              | TCGA-C5-A1MJ-01 |
|           | HPV:E1     | PVT1:Intron        | chr8:128978455  | 2118             | No                  |              | 5'              | TCGA-C5-A1MJ-01 |
| LOC727677 | HPV:E6     | LOC727677:Intron   | chr8:128404748  | 226              | Yes                 | Non-coding   | 5'              | TCGA-EK-A2H1-01 |
|           | HPV:E1     | LOC727677:Intron   | chr8:128404748  | 877              | Yes                 |              | 5'              | TCGA-EK-A2H1-01 |
|           | HPV:E2     | LOC727677:Intron   | chr8:128404748  | 3631             | Yes                 |              | 5'              | TCGA-EK-A2H1-01 |
|           | HPV:E6     | LOC727677:Exon     | chr8:128302307  | 236              | Yes                 |              | 5'              | TCGA-FU-A23K-01 |
|           | HPV:E1     | LOC727677:Exon     | chr8:128302307  | 932              | Yes                 |              | 5'              | TCGA-FU-A23K-01 |
|           | HPV:E1     | LOC727677:Exon     | chr8:128302307  | 1361             | Yes                 |              | 5'              | TCGA-FU-A23K-01 |
|           | HPV:E6     | LOC727677:Exon     | chr8:128302306  | 222              | Yes                 |              | 5'              | TCGA-FU-A23L-01 |
|           | HPV:E1     | LOC727677:Exon     | chr8:128302306  | 932              | Yes                 |              | 5'              | TCGA-FU-A23L-01 |
|           | HPV:E6     | LOC727677:Intron   | chr8:128312059  | 222              | Yes                 |              | 5'              | TCGA-FU-A23L-01 |
|           | HPV:E1     | LOC727677:Intron   | chr8:128312059  | 932              | Yes                 |              | 5'              | TCGA-FU-A23L-01 |
| RAD51B    | HPV:E1     | RAD51B:Intron      | chr14:68646030  | 929              | No                  | N/A          | 5'              | TCGA-EK-A2R8-01 |
|           | HPV:E6     | RAD51B:Intron      | chr14:68646030  | 230              | No                  | N/A          | 5'              | TCGA-EK-A2R8-01 |
|           | HPV:E1     | RAD51B:Intron      | chr14:68651472  | 931              | No                  | N/A          | 5'              | TCGA-EK-A2R8-01 |
|           | HPV:E1     | RAD51B:Intron      | chr14:68671846  | 2669             | No                  | N/A          | 5'              | TCGA-EK-A2R8-01 |
|           | HPV:E1     | RAD51B:Exon        | chr14:69149653  | 840              | Yes                 | Out-of-frame | 5'              | TCGA-EK-A2H0-01 |
|           | HPV:E7     | RAD51B:Exon        | chr14:69149653  | 131              | Yes                 | Out-of-frame | 5'              | TCGA-EK-A2H0-01 |
|           | HPV:E1     | RAD51B:Intron      | chr14:68701639  | 881              | Yes                 | N/A          | 5'              | TCGA-BA-4077-01 |
|           | HPV:E1     | RAD51B:Intron      | chr14:68703892  | 881              | Yes                 | N/A          | 5'              | TCGA-BA-4077-01 |
|           | HPV:E1     | RAD51B:Exon        | chr14:68758600  | 883              | Yes                 | Out-of-frame | 3'              | TCGA-BA-4077-01 |
|           | HPV:E6     | RAD51B:Exon        | chr14:68758600  | 228              | Yes                 | In-frame     | 3'              | TCGA-BA-4077-01 |
|           | HPV:E1     | RAD51B:Intron      | chr14:68801478  | 880              | No                  | N/A          | 5'              | TCGA-C5-A1BE-01 |
| ERBB2     | HPV:E7     | ERBB2:Exon         | chr17:37873744  | 576              | No                  | N/A          | 5'              | TCGA-C5-A1M9-01 |
|           | HPV:E6     | ERBB2:Exon, 5' UTR | chr17:37855840  | 408              | Yes                 | N/A          | 5'              | TCGA-DS-A0VM-01 |

### Supplementary Table S5. Detailed mapping of fusion breakpoints in recurrent genes.

Integration breakpoints in recurrent genes were further fine-mapped by identification of breakpoint-spanning reads (partly human and partly viral). Where applicable, we determined whether fusions were in-frame or out-of-frame. 2 and 1 spanning reads, respectively, supported sites in *ERBB2*, while remaining listed sites were all supported by at least 10 reads. In cases where the exact breakpoint could not be determined due to identity between human and viral sequences (at most a 4 nt span), the position closest to human is presented.
