# Supplementary material for: The landscape of viral expression and host gene fusion and adaptation in human cancer
Source: Springer Nature journal article supplement (doi:10.1038/ncomms3513), 2013-10-01
Supplement: 41467_2013_BFncomms3513_MOESM356_ESM.pdf [file 41467_2013_BFncomms3513_MOESM356_ESM.pdf]

Supplementary Data 7: Viral gene expression patterns  
 Viral gene expression patterns (coverage plots) for all positive tumors (>2 ppm).

BLCA

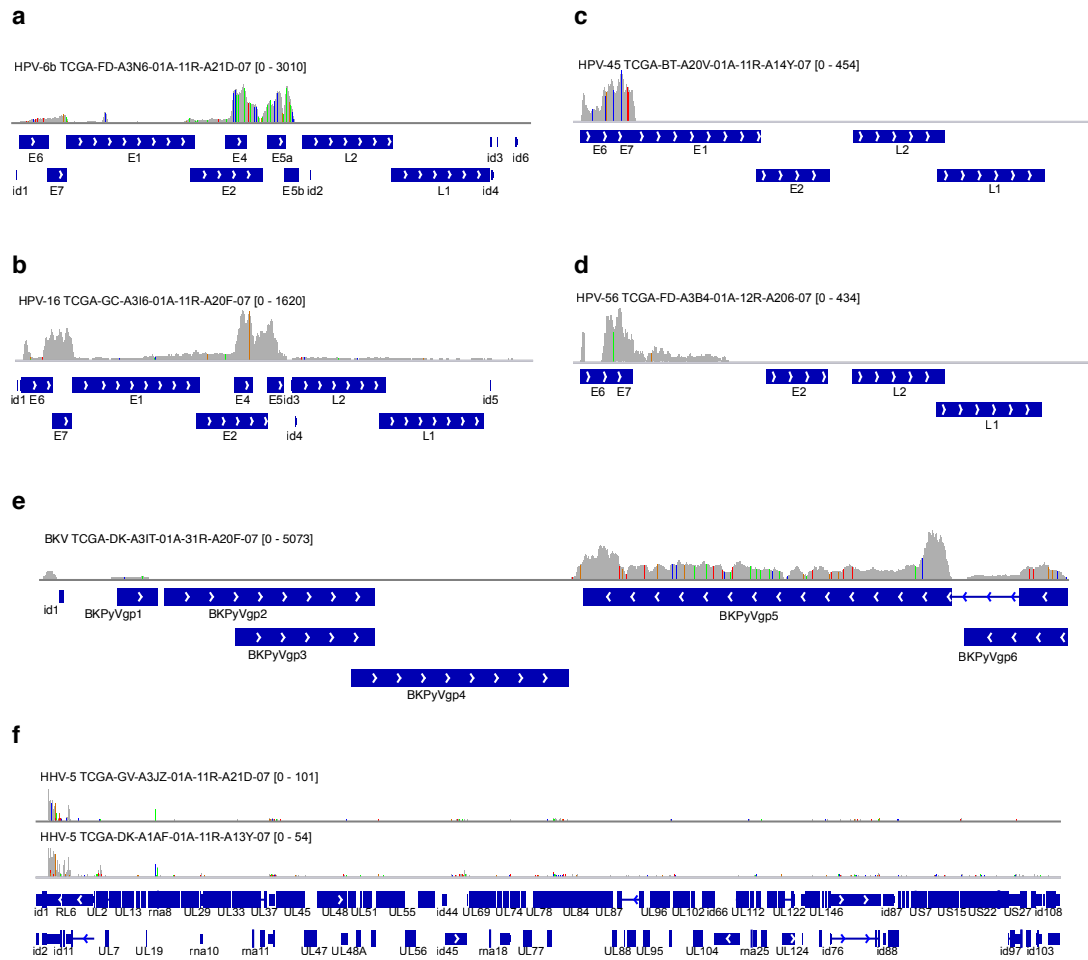

**Graphical illustration of viral gene expression patterns in virus-positive BLCA.** Viral mRNA aligned to (a) HPV6b, (b) HPV16, (c) HPV45, (d) HPV56, (e) BKV and (f) HHV5. Count reads shown as numbers within brackets and colored rows in mRNA pattern profile represent nucleotide mismatches to reference sequence.

## BRCA

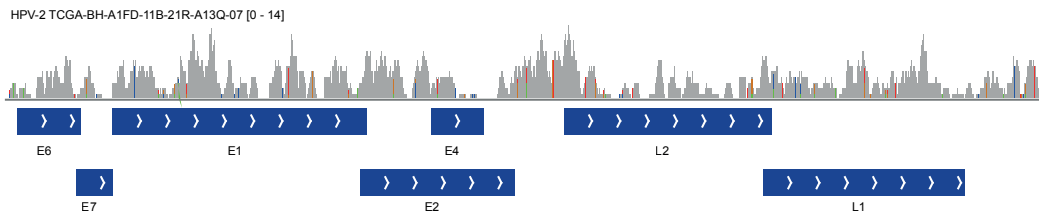

**Graphical illustration of viral gene expression patterns in virus-positive BRCA.** Viral mRNA aligned to HPV2. Count reads shown as numbers within brackets and colored rows in mRNA pattern profile represent nucleotide mismatches to reference sequence.

**a**

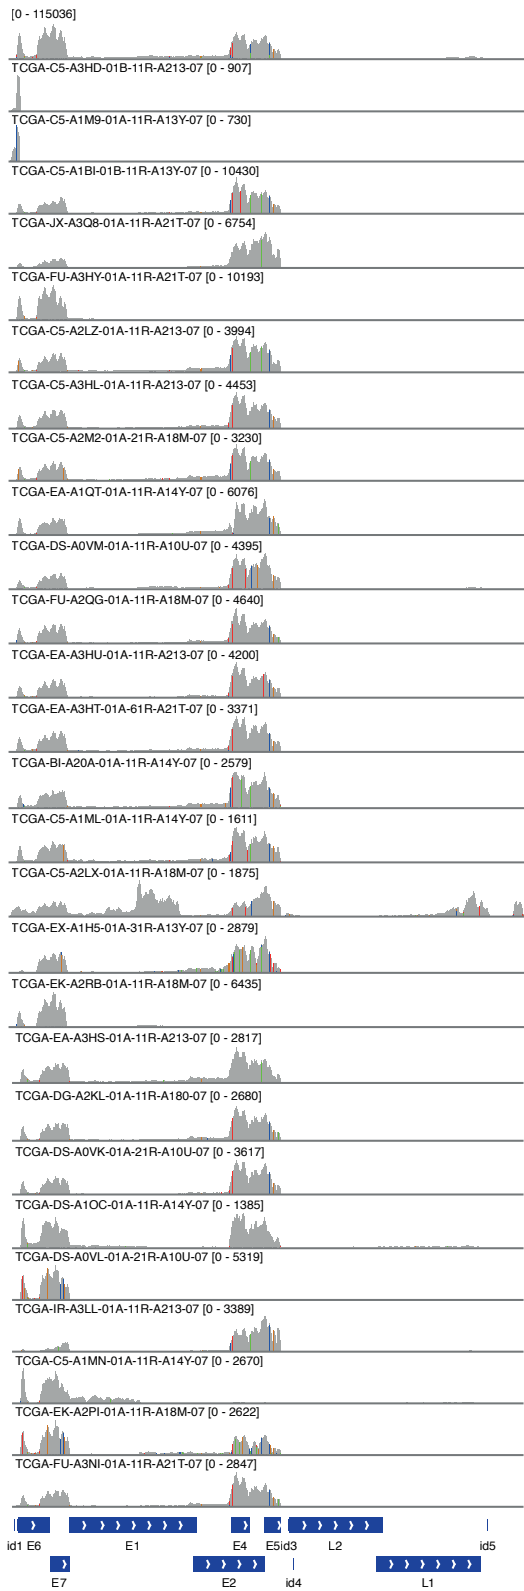

**CESC**

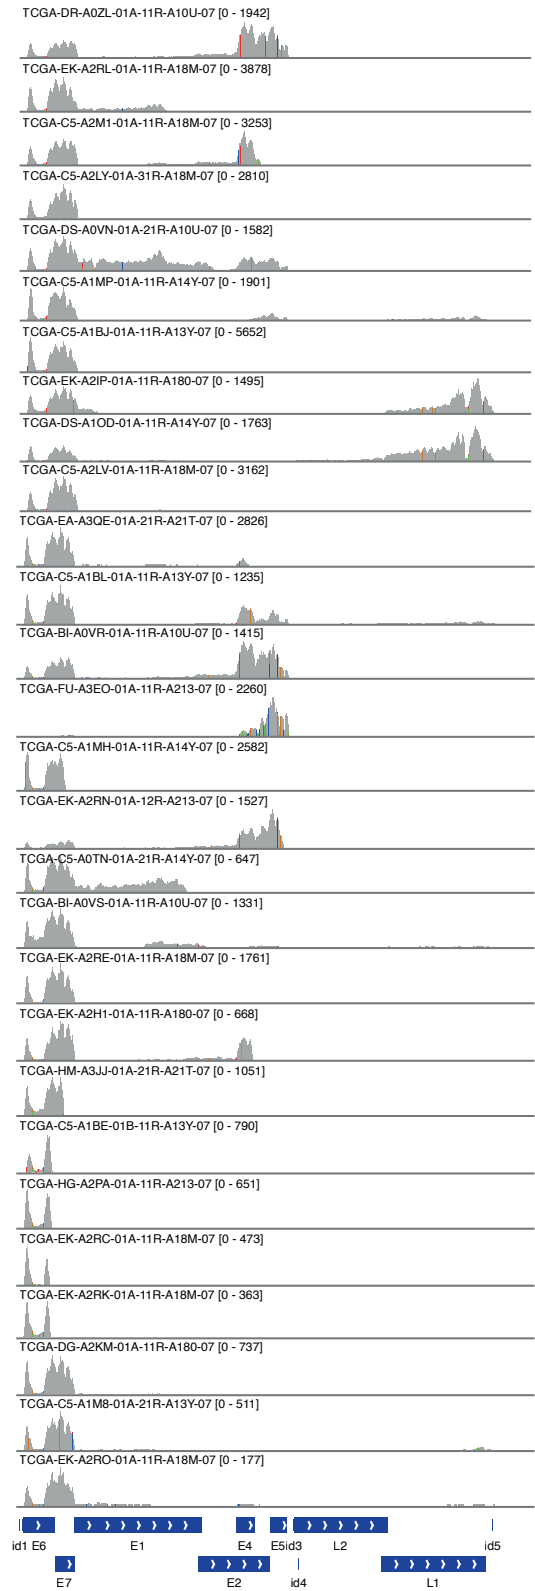

## CESC (2)

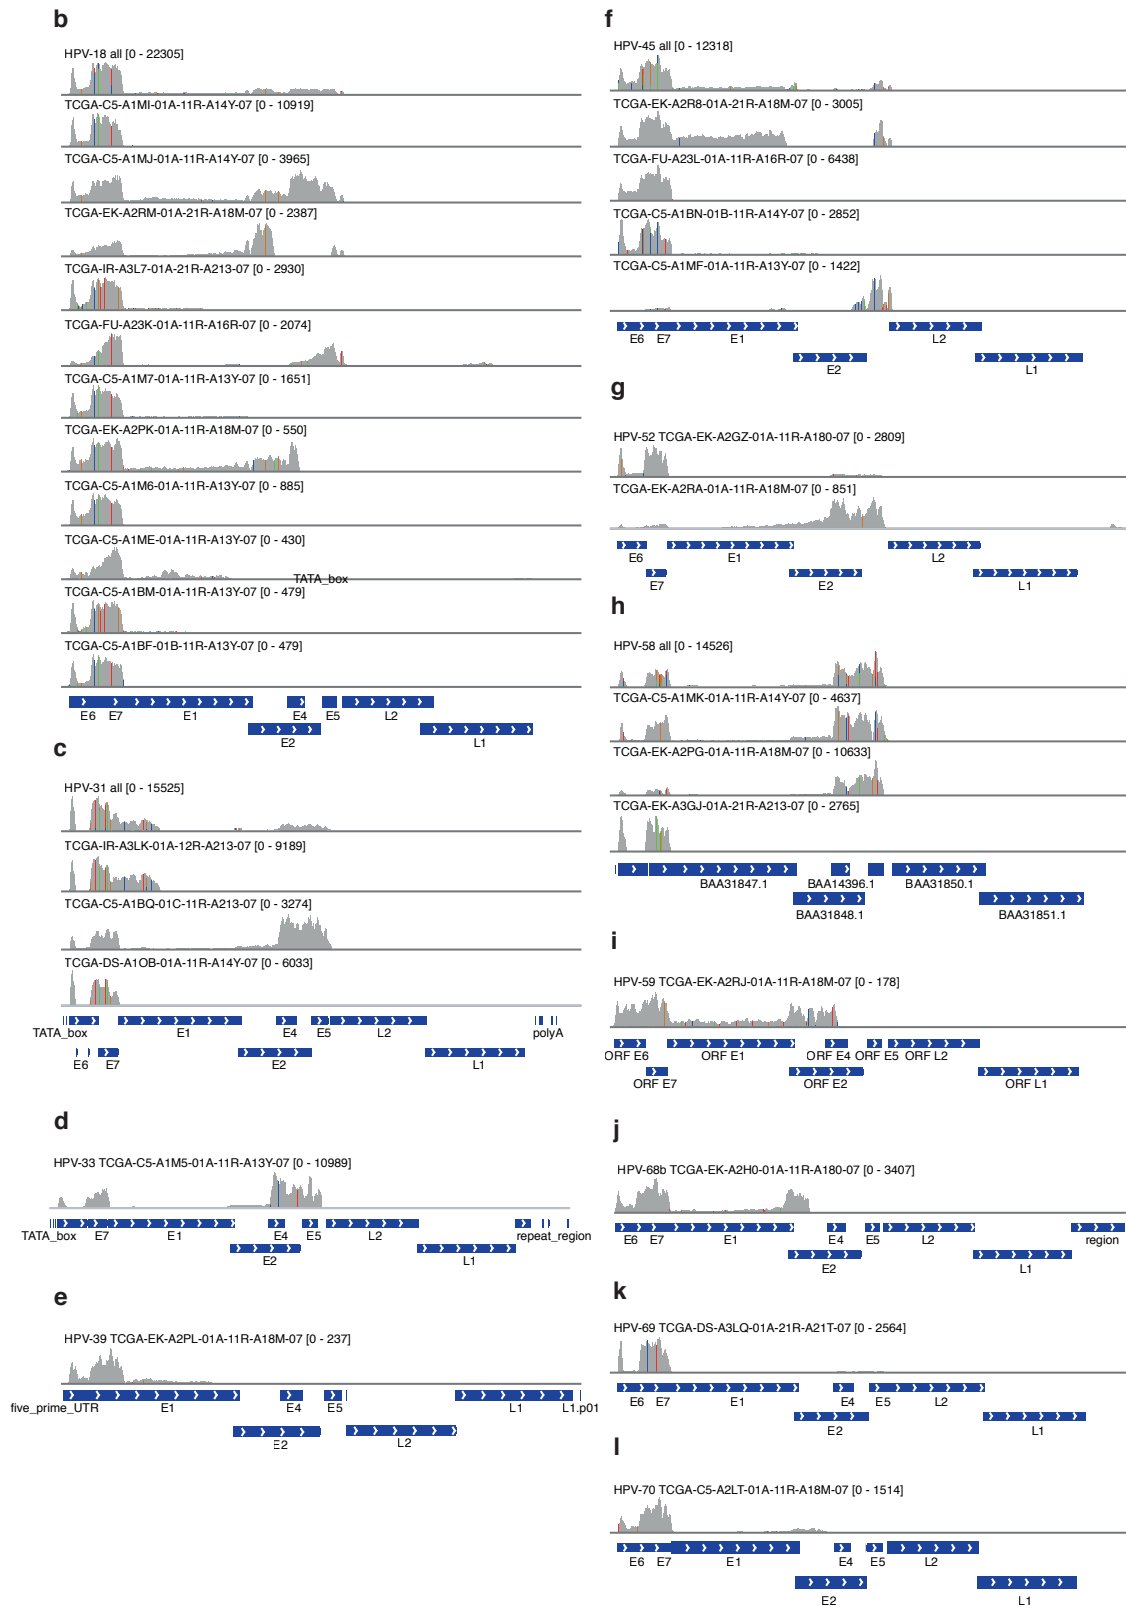

**Graphical illustration of viral gene expression patterns in virus-positive CESC.** Viral mRNA aligned to (a) HPV16, (b) HPV18, (c) HPV31, (d) HPV33, (e) HPV39, (f) HPV45, (g) HPV52, (h) HPV58, (i) HPV59, (j) HPV68b, (k) HPV69 and (l) HPV70. Count reads shown as numbers within brackets and colored rows in mRNA pattern profile represent nucleotide mismatches to reference sequence.

# COAD

**a**

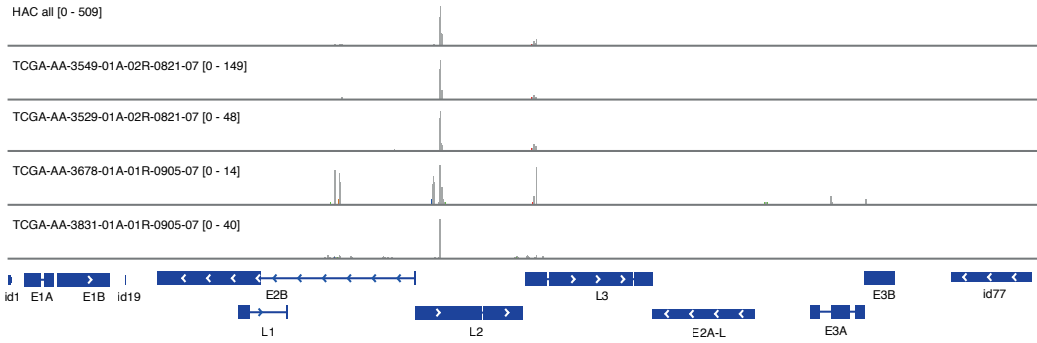

**b**

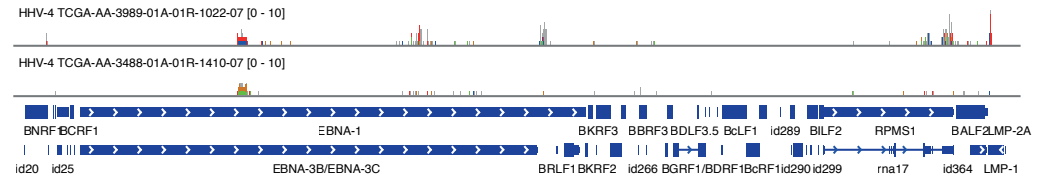

**c**

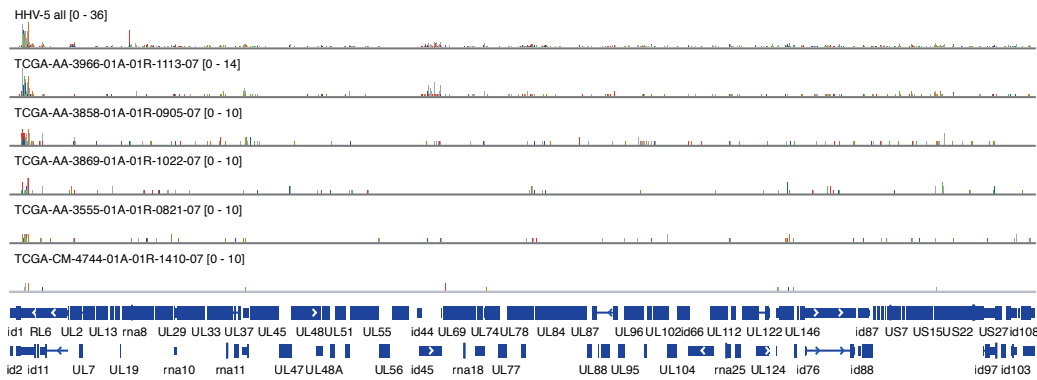

## COAD (2)

d

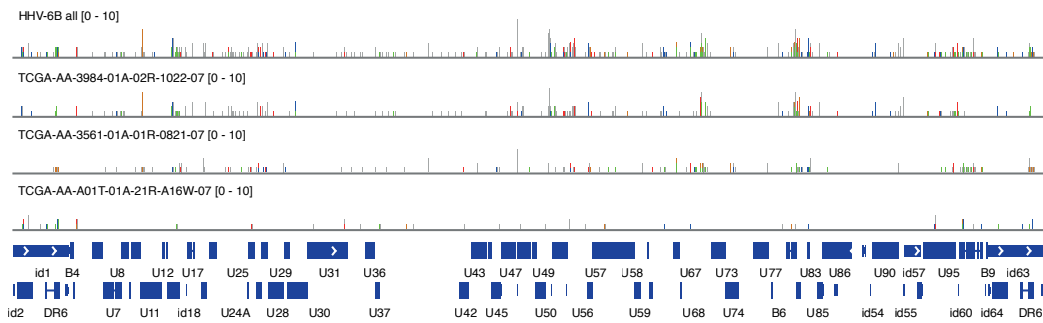

e

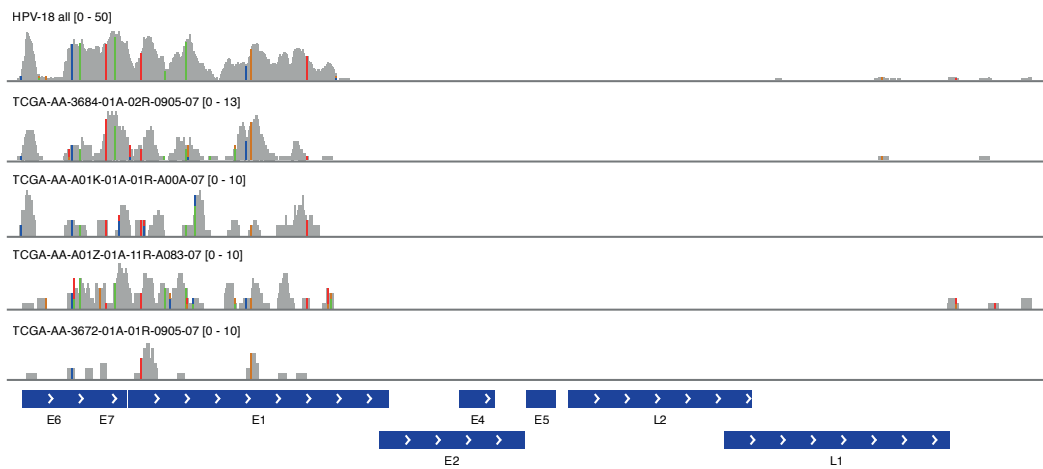

f

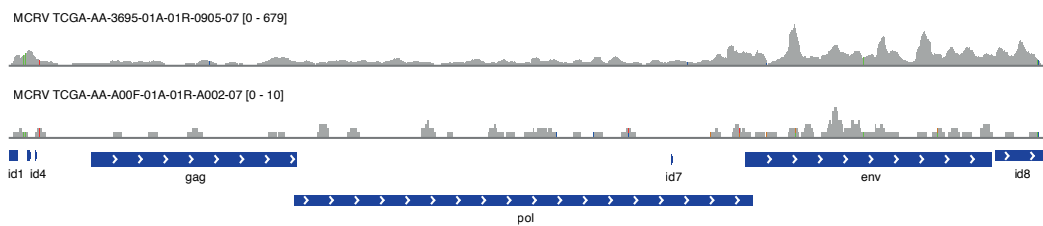

g

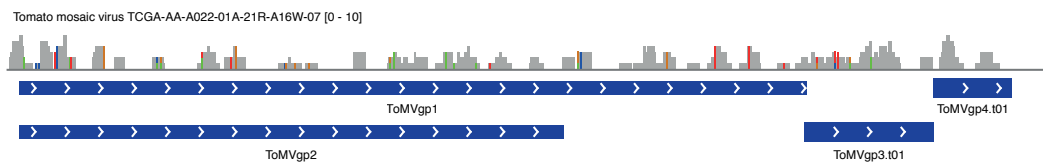

**Graphical illustration of viral gene expression patterns in virus-positive COAD.** Viral mRNA aligned to (a) HAC, (b) HHV4, (c) HHV5, (d) HHV6B, (e) HPV18, (f) MCRV and (g) Tomato mosaic virus. Count reads shown as numbers within brackets and colored rows in mRNA pattern profile represent nucleotide mismatches to reference sequence.

# HNSC

**a**

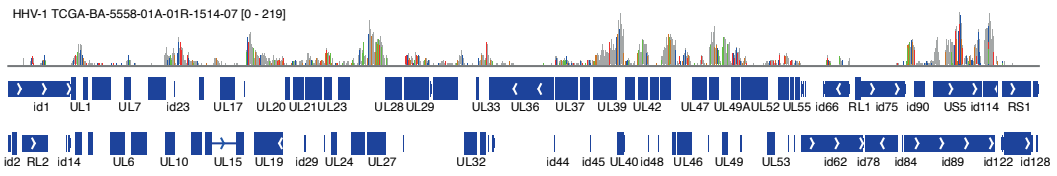

**b**

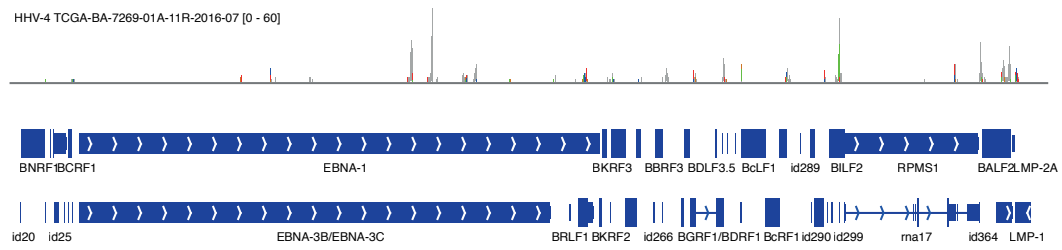

## HNSC (2)

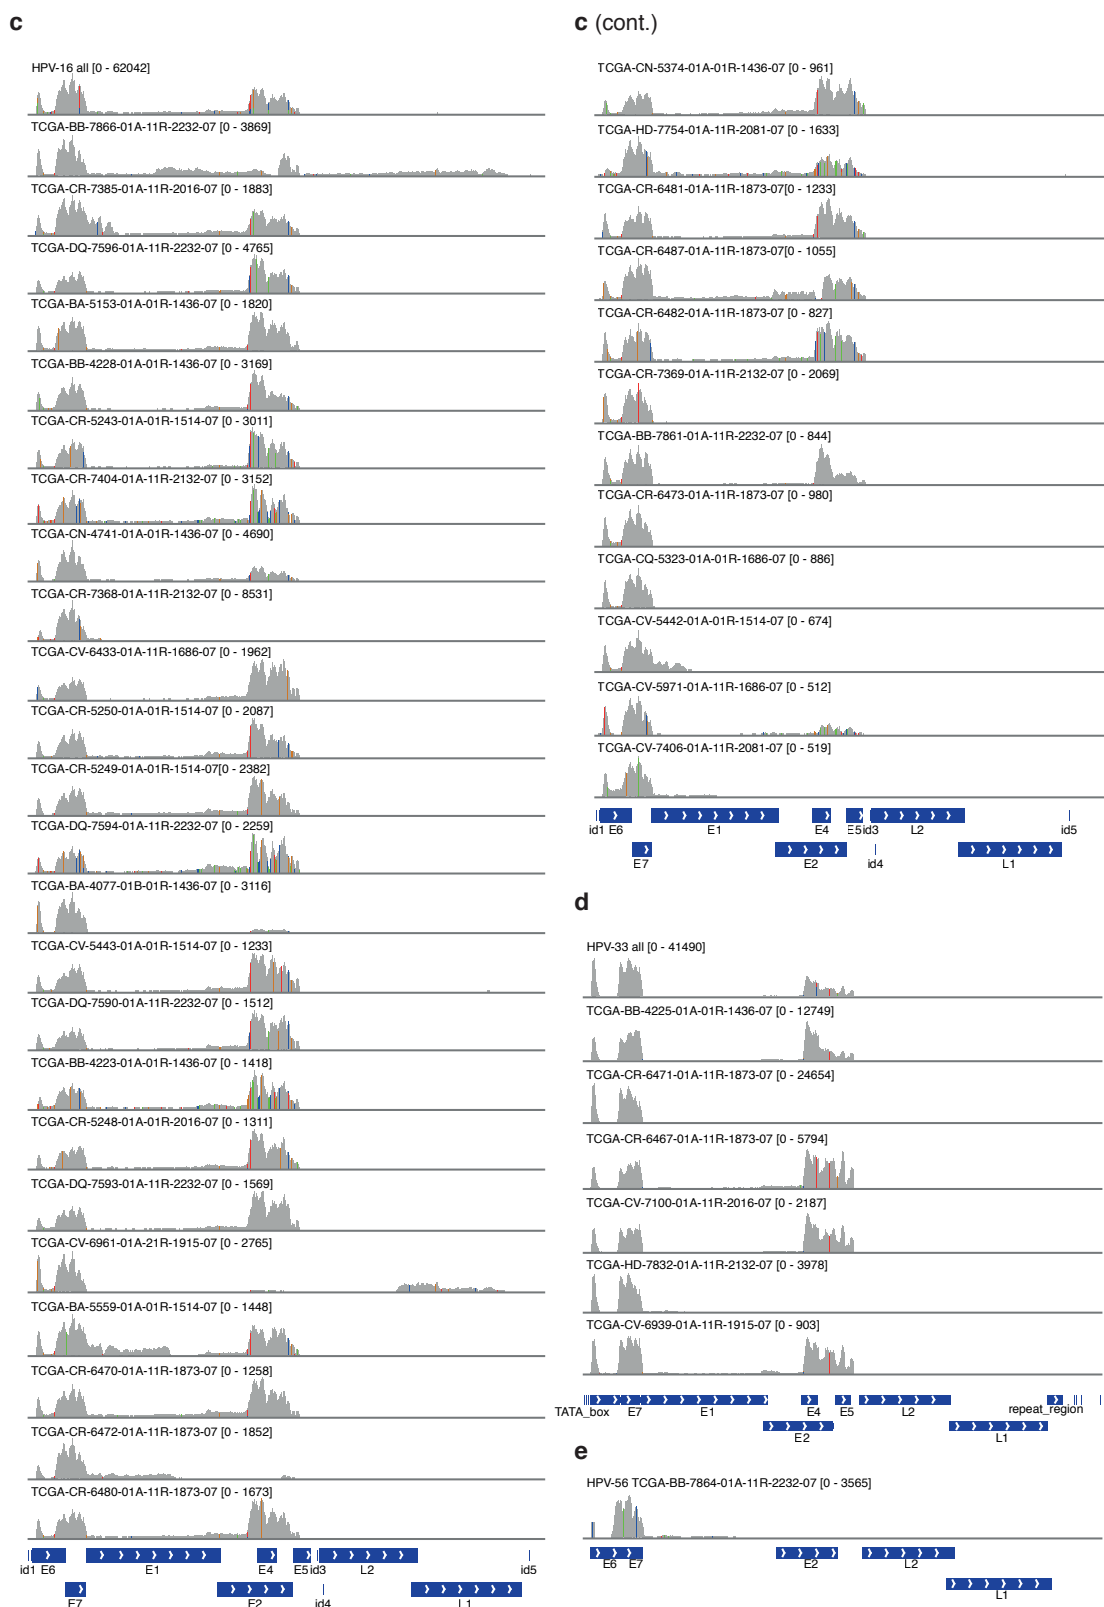

**Graphical illustration of viral gene expression patterns in virus-positive HNSC.** Viral mRNA aligned to (a) HHV1, (b) HHV4, (c) HPV16, (d) HPV33 and (e) HPV56. Count reads shown as numbers within brackets and colored rows in mRNA pattern profile represent nucleotide mismatches to reference sequence.



## KIRC

**a**

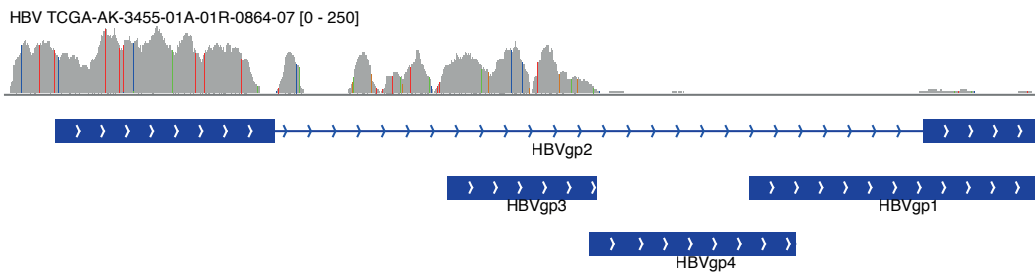

**b**

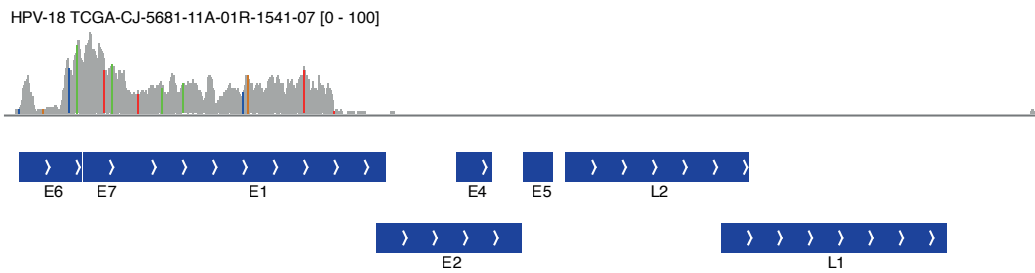

**Graphical illustration of viral gene expression patterns in virus-positive KIRC.** Viral mRNA aligned to (a) HBV and (b) HPV18. Count reads shown as numbers within brackets and colored rows in mRNA pattern profile represent nucleotide mismatches to reference sequence.

## LAML

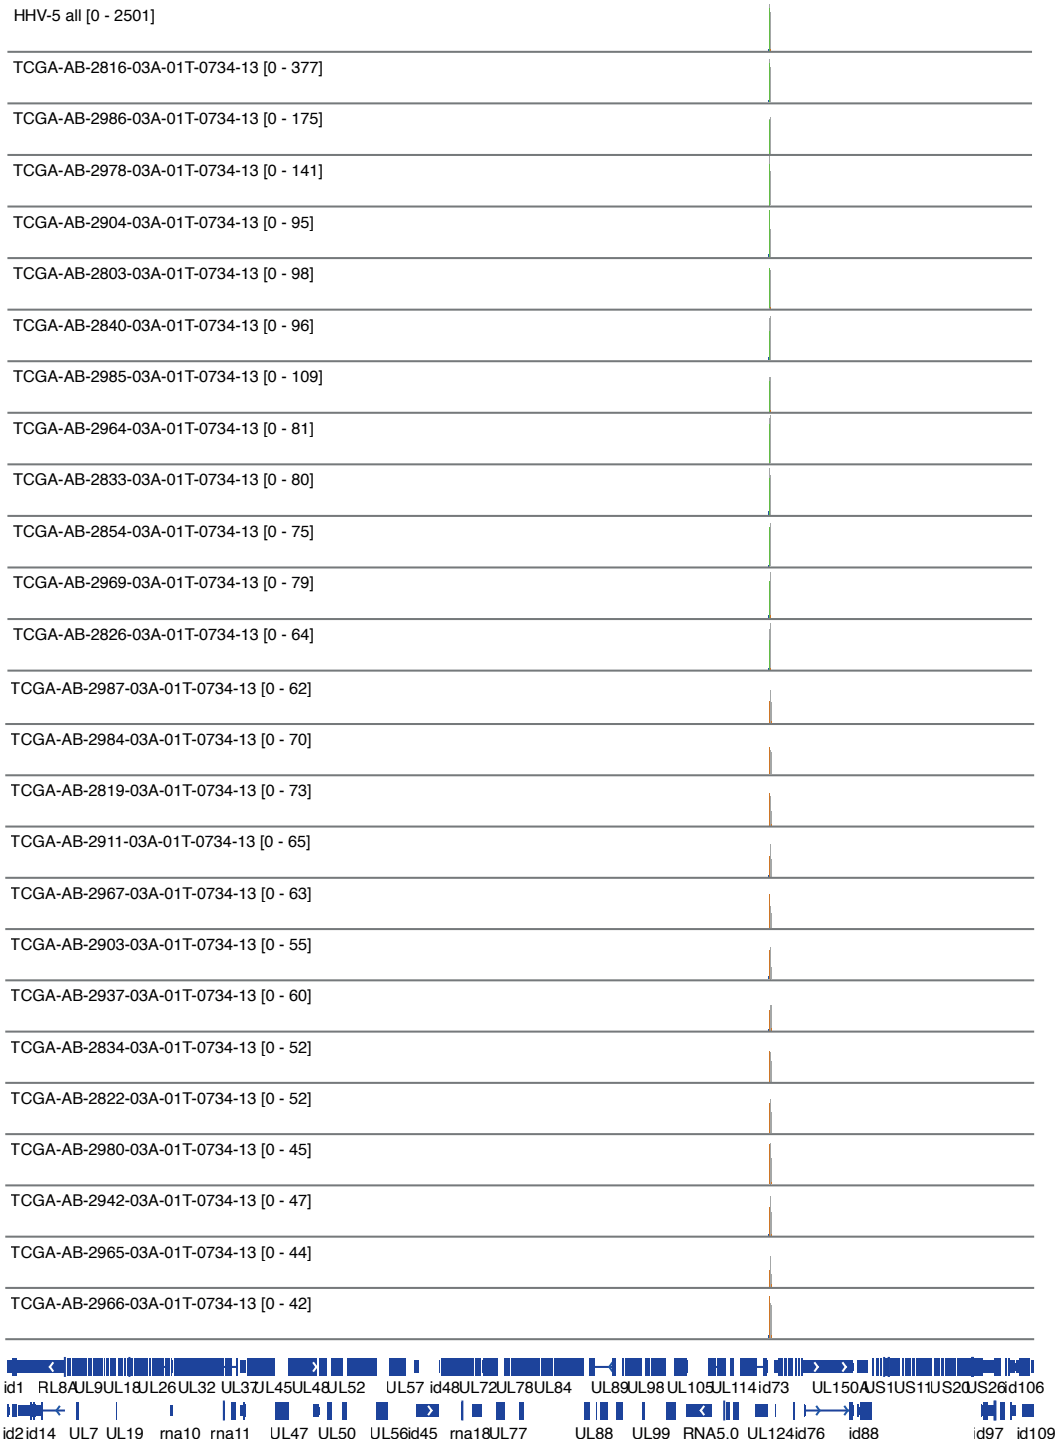

**Graphical illustration of viral gene expression patterns in virus-positive LAML.** Viral mRNA aligned to HHV5. Count reads shown as numbers within brackets and colored rows in mRNA pattern profile represent nucleotide mismatches to reference sequence.

## LIHC

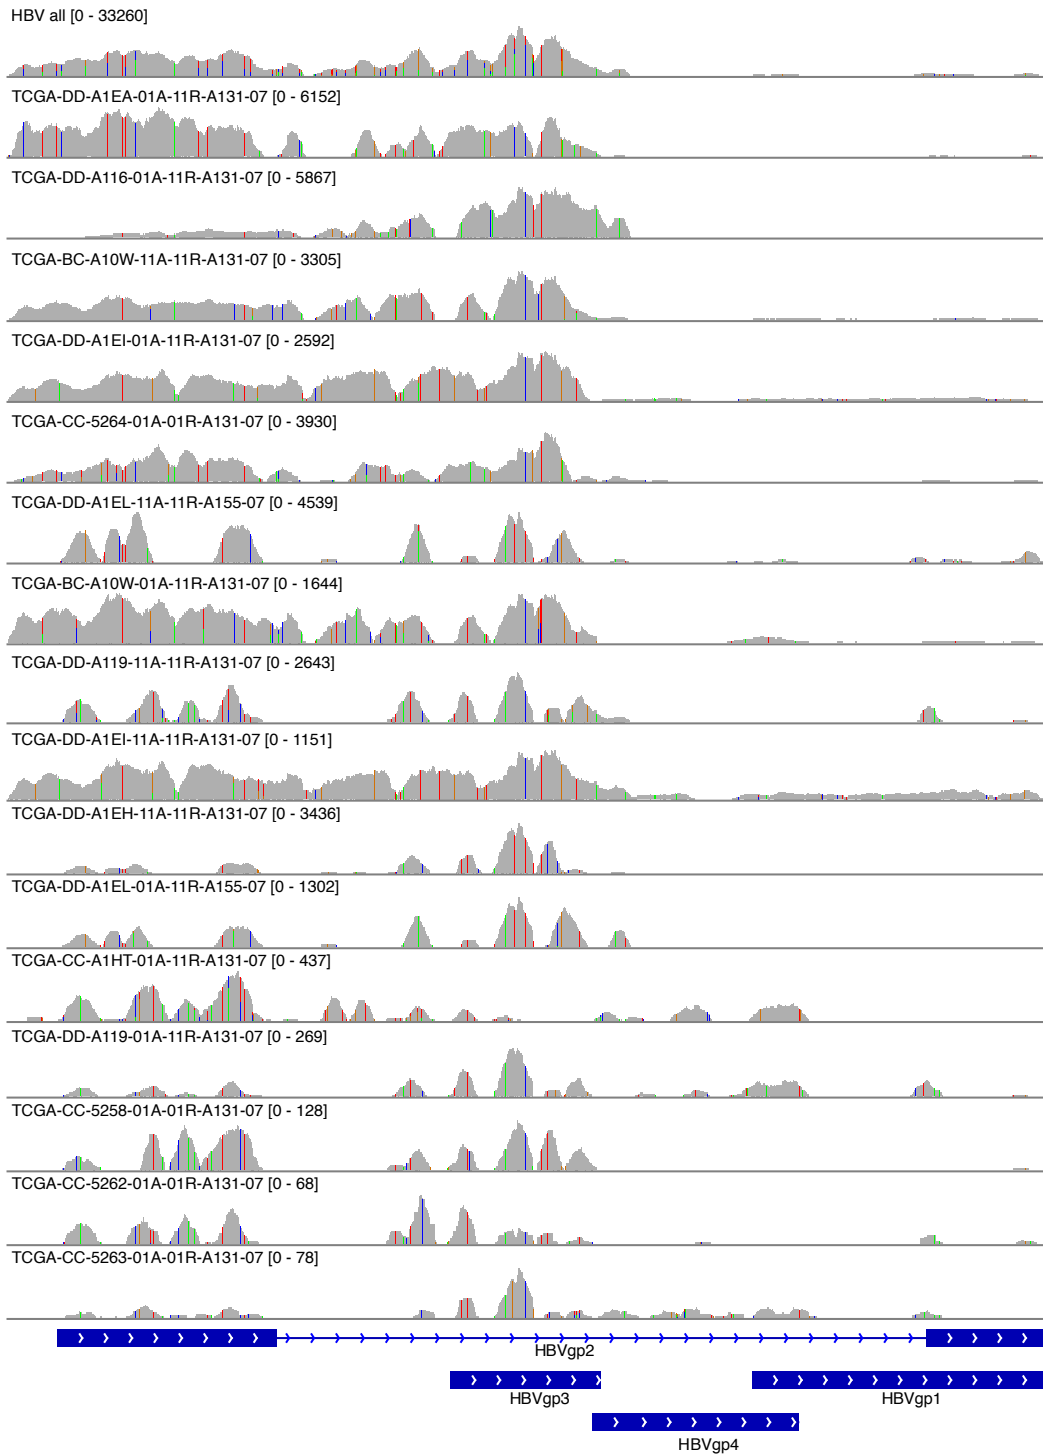

**Graphical illustration of viral gene expression patterns in virus-positive LIHC.** Viral mRNA aligned to HBV. Count reads shown as numbers within brackets and colored rows in mRNA pattern profile represent nucleotide mismatches to reference sequence.

## LUAD

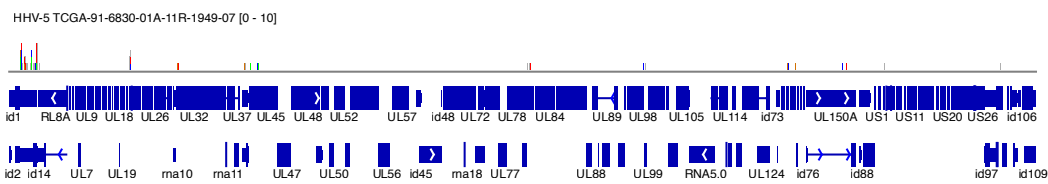

**Graphical illustration of viral gene expression patterns in virus-positive LUAD.** Viral mRNA aligned to HHV5. Count reads shown as numbers within brackets and colored rows in mRNA pattern profile represent nucleotide mismatches to reference sequence.

## LUSC

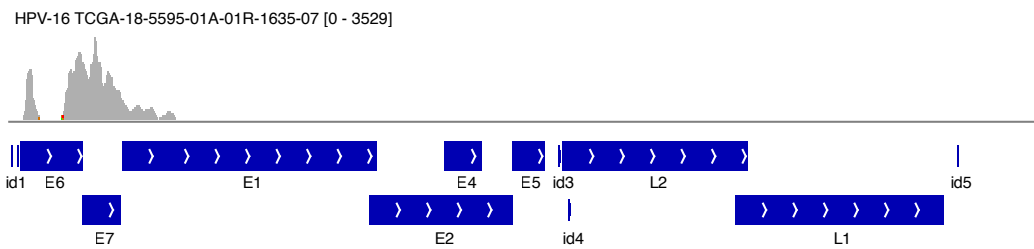

**Graphical illustration of viral gene expression patterns in virus-positive LUSC.** Viral mRNA aligned to HPV16. Count reads shown as numbers within brackets and colored rows in mRNA pattern profile represent nucleotide mismatches to reference sequence.

## OV

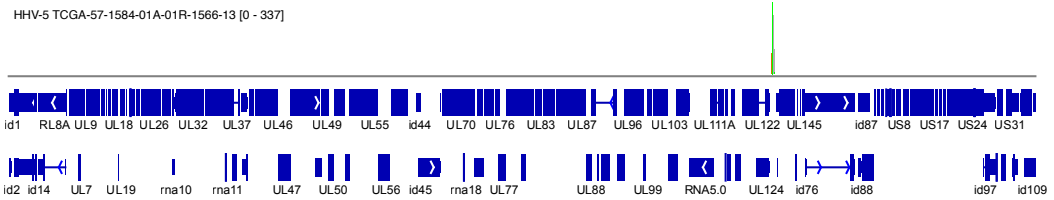

**Graphical illustration of viral gene expression patterns in virus-positive OV.** Viral mRNA aligned to HHV5. Count reads shown as numbers within brackets and colored rows in mRNA pattern profile represent nucleotide mismatches to reference sequence.

# READ

**a**

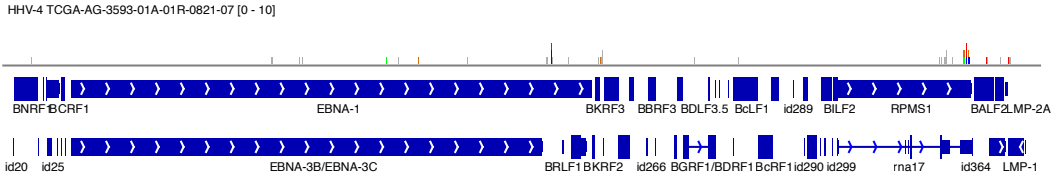

**b**

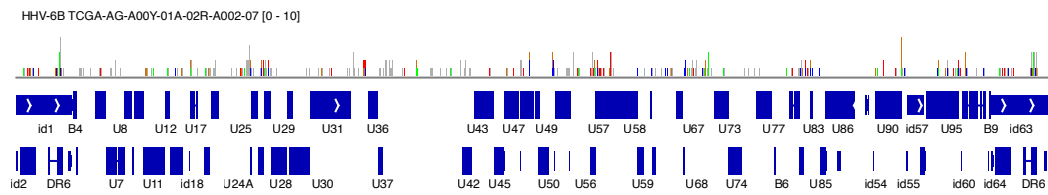

**c**

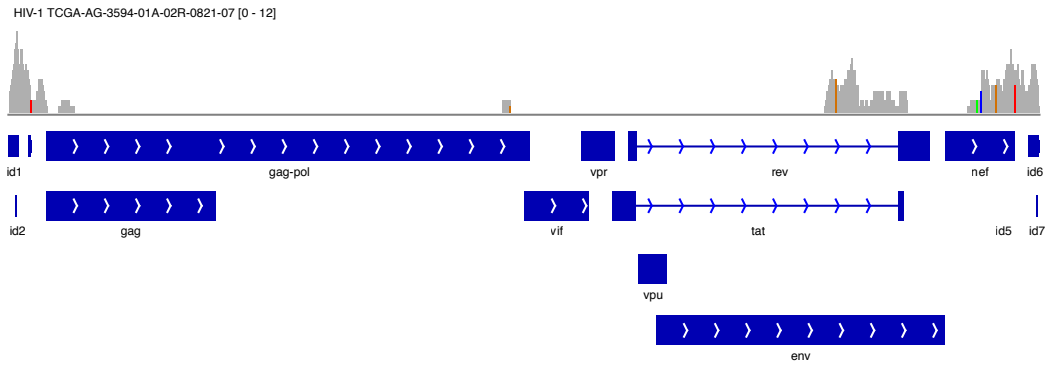

**d**

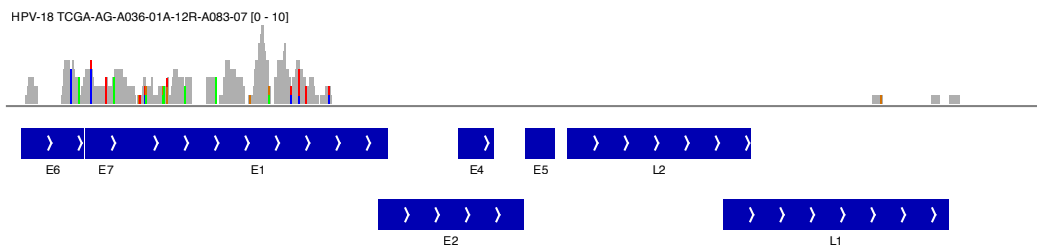

**Graphical illustration of viral gene expression patterns in virus-positive READ.** Viral mRNA aligned to (a) HHV4, (b) HHV6B, (c) HIV1 and (d) HPV18. Count reads shown as numbers within brackets and colored rows in mRNA pattern profile represent nucleotide mismatches to reference sequence.

## SKCM

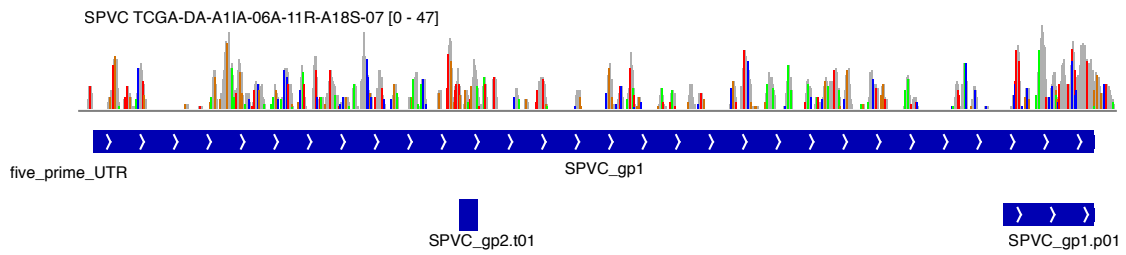

**Graphical illustration of viral gene expression patterns in virus-positive SKCM.** Viral mRNA aligned to SPVC. Count reads shown as numbers within brackets and colored rows in mRNA pattern profile represent nucleotide mismatches to reference sequence.



## STAD

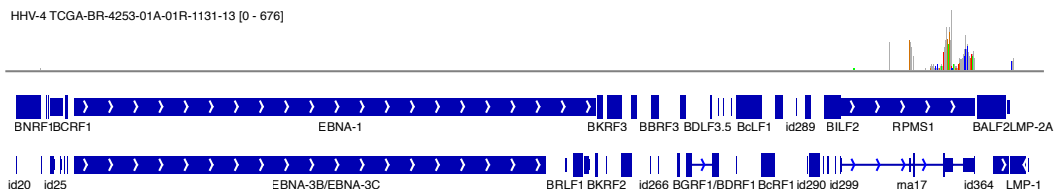

**Graphical illustration of viral gene expression patterns in virus-positive STAD.** Viral mRNA aligned to HHV4. Count reads shown as numbers within brackets and colored rows in mRNA pattern profile represent nucleotide mismatches to reference sequence.
